# Supplementary material for: Infrared multiple photon dissociation spectroscopy of cationized methionine: effects of alkali-metal cation size on gas-phase conformation
Source: Royal Society of Chemistry journal article supplement (doi:10.1039/b919039b), 2010-01-01
Supplement: b919039b.pdf [file b919039b.pdf]

**Supporting Information for**

**Infrared Multiple Photon Dissociation Spectroscopy of Cationized Methionine: Effects of Alkali-Metal Cation Size on Gas-Phase Conformation**

By D. R. Carl, T. E. Cooper, J. Oomens, J. D. Steill, and P. B. Armentrout

A description of the structures of Met and  $M^+(\text{Met})$  for  $M^+ = \text{Li}^+, \text{Na}^+, \text{K}^+, \text{Rb}^+, \text{and Cs}^+$ . Two figures (S1a and S1b) depicting the 298 K Gibbs free energies calculated at the **R**/6-311+G(2d,2p)//B3LYP/6-311+G(d,p) ( $M^+ = \text{Li}^+, \text{Na}^+, \text{K}^+$ ) and **R**/HW\*/6-311+G(2d,2p)//B3LYP/HW\*6-311+G(d,p) ( $M^+ = \text{Rb}^+ \text{ and } \text{Cs}^+$ ) levels, where **R** = B3LYP (S1a) and B3P86 (S1b) for eight distinct conformations. One table (S1) providing 0 K relative energies calculated at the **R**/HW\*/6-311+G(2d,2p) and **R**/Def2TZVP levels of theory, where **R** = B3LYP, B3P86, and MP2(full), for eight conformations of  $\text{Rb}^+(\text{Met})$  and  $\text{Cs}^+(\text{Met})$ . Two tables (S2 and S3) providing geometric parameters (bond lengths, bond angles, and dihedral angles) for low-energy structures of  $M^+(\text{Met})$ . Vibrational frequencies and IR intensities are calculated for  $M^+(\text{Met})$  at the B3LYP/6-311+G(d,p) ( $M^+ = \text{Li}^+, \text{Na}^+, \text{K}^+$ ) and B3LYP/HW\*/6-311+G(d,p) ( $M^+ = \text{Rb}^+ \text{ and } \text{Cs}^+$ ) levels. Four tables (S4–S7) providing the vibrational frequencies and IR intensities for the [N,CO,S] tgcgt, tgcgg, tgggt, and tgggg conformers for all  $M^+(\text{Met})$ . Two tables (S8 and S10) providing vibrational frequencies and IR intensities for the  $[\text{CO}_2^-]$  ctggg and [COOH] ctggg conformers for all  $M^+(\text{Met})$ . Two tables (S9 and S11) providing vibrational frequencies and IR intensities for the  $[\text{CO}_2^-]$  cgtgg and ctggt and [COOH] cgtgg and ctggt conformers for  $\text{K}^+(\text{Met})$  to  $\text{Cs}^+(\text{Met})$ . One table (S12) providing vibrational frequencies and IR intensities for the [COOH,S] cgggg conformers for  $\text{Na}^+(\text{Met})$  to  $\text{Cs}^+(\text{Met})$ . One table (S13) providing vibrational frequencies and IR intensities for the [COOH,S] cgggt and cgcgg conformers for  $\text{K}^+(\text{Met})$  to  $\text{Cs}^+(\text{Met})$ . Two tables (S14 and S15) providing the vibrational frequencies and IR intensities for four [N,CO,S] and four [N,OH,S] conformers of  $\text{H}^+(\text{Met})$  calculated at the B3LYP/6-311+G(d,p) level.

**Theoretical Results – Structures.** The lowest energy conformations found for neutral methionine have been described in detail elsewhere and are of two types. The N1 conformations have side-chain orientations of tgttg and tgtgt with NH $\cdots$ OC hydrogen bonds (2.564 and 2.521 Å, respectively) and OH $\cdots$ OC hydrogen bonds (2.302 and 2.298 Å, respectively). The N2 type conformation has a COH $\cdots$ N hydrogen bond (1.883 Å) with the lowest energy ctggt side-chain orientation having an additional NH $\cdots$ S hydrogen bond (2.479 Å). Because the methionine side chain is quite flexible, four additional structures for neutral methionine are within 10 kJ/mol of these lowest energy structures. An additional N1 type conformer with a tgttt side-chain orientation is identical to the tgttg orientation except that the side chain is further extended. The N2 ctgtt conformer maintains both COH $\cdots$ N and NH $\cdots$ S hydrogen bonds but is a full angstrom longer than the ctggt structure. The side-chain orientations of two additional N2 conformers, ctttg and cgggg, do not allow the NH $\cdots$ S hydrogen bond to form such that only the COH $\cdots$ N hydrogen bond is present.

The low-lying structures found for all M<sup>+</sup>(Met) complexes are illustrated by those for Rb<sup>+</sup>(Met) in Figure 1 of the main text. Several important geometric parameters for the M<sup>+</sup>(Met) complexes are provided in Tables S2 and S3. For completeness, Table S2 also includes geometric parameters calculated at the B3LYP/Def2TZVP level of theory for Rb<sup>+</sup>(Met) and Cs<sup>+</sup>(Met). In general compared to B3LYP/HW\*/6-311+G(d,p) geometries, metal ligand bond lengths are shorter by 0.07 – 0.21 Å and 0.16 – 0.38 Å for Rb<sup>+</sup> and Cs<sup>+</sup>, respectively, and bond angles are within 5°. In the comparisons below, B3LYP/HW\*/6-311+G(d,p) calculations are used throughout.

For Li<sup>+</sup>(Met) and Na<sup>+</sup>(Met), the ground state structure is the tridentate charge-solvated [N,CO,S] conformation with a tgcgt orientation. This orientation remains the lowest energy [N,CO,S] conformation for K<sup>+</sup>(Met) and Rb<sup>+</sup>(Met) but the CCCC dihedral angle crosses the arbitrary 50° cis-gauche limit to become a tgggt orientation for K<sup>+</sup>(Met) through Cs<sup>+</sup>(Met), Table S3. For convenience, we will retain the tgcgt designation for this orientation for all metal cations in order to distinguish it from an alternative [N,CO,S]tgggt orientation. DFT calculations for

Cs<sup>+</sup>(Met) predict that the tgcgt orientation is the lowest energy [N,CO,S] conformer, whereas MP2(full) energies calculate the tgggg orientation as the lowest [N,CO,S] conformer, Table 1. [N,CO,S] tgcgg and tgggt orientations were also identified as unique structures. Dihedral parameters for the four [N,CO,S] conformers are shown in Table S3. [N,CO,S] tgcgg, tgggt, and tgggg conformers for the Li<sup>+</sup>(Met), Na<sup>+</sup>(Met), and K<sup>+</sup>(Met) complexes are higher in energy by 5 – 12, 7 – 12, and 5 – 10 kJ/mol, respectively, compared to the [N,CO,S] tgcgt conformers, Table 1. The differences drop to 1 – 7 kJ/mol for Rb<sup>+</sup>(Met), and all four orientations are within 4 kJ/mol of one another for Cs<sup>+</sup>(Met).

In all [N,CO,S] conformers, a single hydrogen bond between the carboxylic hydrogen atom and carbonyl oxygen atom is present, Figure 2. For the tgcgt orientation, the M<sup>+</sup>-OC, M<sup>+</sup>-N, and M<sup>+</sup>-S distances increase from 1.938 to 3.106 Å, 2.068 to 3.445 Å, and 2.439 to 3.781 Å, respectively, as the size of the metal cation increases from Li<sup>+</sup> to Cs<sup>+</sup>, Table S2. Similar differences in these bond distances are found for the tgcgg, tgggt, and tgggg orientations. These changes directly reflect the increase in the ionic radius of the metal cation (0.70 Å for Li<sup>+</sup>, 0.98 Å for Na<sup>+</sup>, 1.33 Å for K<sup>+</sup>, 1.49 Å for Rb<sup>+</sup>, and 1.69 Å for Cs<sup>+</sup>)<sup>1</sup> coupled with the resultant decreasing charge density, which weakens the electrostatic interaction with methionine. The ∠NM<sup>+</sup>O, ∠NM<sup>+</sup>S, and ∠OM<sup>+</sup>S angles decrease as the metal cation becomes heavier, consistent with an elongation of the M<sup>+</sup>-OC, M<sup>+</sup>-N, and M<sup>+</sup>-S distances, Table S2. Because of the small M<sup>+</sup>-OC, M<sup>+</sup>-N, and M<sup>+</sup>-S distances in Li<sup>+</sup>(Met) and Na<sup>+</sup>(Met), the position of the terminal methyl group in the [N,CO,S] orientations is an important factor in establishing the relative energies, whereas in the larger M<sup>+</sup>(Met) systems (M<sup>+</sup> = K<sup>+</sup>, Rb<sup>+</sup>, and Cs<sup>+</sup>), the methyl group position isn't as critical because these bond distances are larger. The terminal methyl group points away from the metal binding site in all orientations except for the tgggg orientation, such that the methyl group begins to interact repulsively with the carboxylic acid moiety.

For the zwitterionic [CO<sub>2</sub><sup>-</sup>] conformer, a ctggg orientation is the lowest energy structure, Table 1. The protonated amine group forms hydrogen bonds with the sulfur of the amino acid side chain and the carboxylate oxygen atom, Figure 2. The NH<sup>+</sup>⋯S hydrogen bond increases

from 2.209 to 2.234 Å, whereas the NH $\cdots$ OC interaction decreases from 1.816 to 1.758 Å for K $^+$ (Met) to Cs $^+$ (Met). The M $^+$ -O bond lengths are similar to each other, but the oxygen interacting with the NH $_3^+$  group is longer by 0.02 – 0.05 Å, Table S2. These bond lengths increase as the metal cation gets heavier, in proportion to the cation sizes noted above, reflecting the weaker metal cation binding as the metal gets larger. The [COOH] conformation is the charge-solvated analogue of the zwitterionic [CO $_2^-$ ], with the only difference being the position of the proton shared between the amine nitrogen atom and the carboxylate group, Figure 2. As for [CO $_2^-$ ], all levels of theory for the [COOH] conformation prefer a ctggg side chain orientation. The neutral NH $_2$  group now hydrogen bonds to the sulfur atom of the amino acid chain and the acidic hydrogen atom of the carboxylic acid. Compared to [CO $_2^-$ ] conformers, the M $^+$ -OC bond distances are similar (0.01 – 0.04 Å longer), whereas the M $^+$ -OH bond distances increase substantially (0.10 – 0.18 Å longer). From K $^+$ (Met) to Cs $^+$ (Met), the OH $\cdots$ N and NH $\cdots$ S hydrogen bonds increase by 0.033 and 0.025 Å, respectively. Alternate cgtgg and ctggt orientations were also found for [CO $_2^-$ ] and [COOH] conformers for all M $^+$ . These structures are nearly isoenergetic with the ctggg orientations for DFT energies regardless of the cation size, whereas MP2(full) results predict slightly larger energetic differences between the structures, Table 1. For all metal cations, the geometrical parameters of the amino acid side chain are similar for the analogous [CO $_2^-$ ] and [COOH] conformers, Table S3.

Another low-energy structure for the K $^+$ (Met), Rb $^+$ (Met), and Cs $^+$ (Met) complexes is the charge-solvated, tridentate [COOH,S] conformation, in which the metal ion interacts with the sulfur of the amino acid side chain in addition to both oxygen atoms of the carboxylic acid moiety, Figure 2. For K $^+$ (Met) and Rb $^+$ (Met), the lowest energy [COOH,S] conformer is a cgggt orientation for DFT calculations, Table 1, whereas a cgggg orientation is preferred at the MP2(full) level of theory. The cgggt orientation in K $^+$ (Met) and Rb $^+$ (Met) progresses into a ctggt orientation for Cs $^+$ (Met), which is the lowest energy [COOH,S] orientation at all levels of theory, but only because the OCCC dihedral angle has increased over the arbitrary 135° gauche-trans limit, Table S2. For consistency, this set of structures will be identified as the

[COOH,S]cgggt orientation for  $\text{Cs}^+(\text{Met})$  as well as the lighter metals. The ligand structure changes very little with metal cations for the cgggg orientation, Table S2, whereas the OCCC, CCCC, and CCCS dihedral angles in the cgggt orientations change appreciably from  $\text{K}^+(\text{Met})$  to  $\text{Cs}^+(\text{Met})$ , Table S2. The cgggg and cgggt orientations differ primarily in the position of the terminal methyl group, which is located much closer to the carboxylic acid moiety in the cgggg orientation than in the cgggt orientation. Table S2 shows that the cgggg conformer allows shorter  $\text{M}^+\text{-OH}$  bonds (by 0.10 – 0.20 Å) by compensating with longer  $\text{M}^+\text{-OC}$  bonds (by 0.03 – 0.06 Å) and variable  $\text{M}^+\text{-S}$  bond lengths (longer for  $\text{K}^+$  by 0.03 Å, comparable for  $\text{Rb}^+$ , and shorter for  $\text{Cs}^+$  by 0.20 Å) with respect to the [COOH,S] cgggt conformer.

Four additional high energy conformations were identified for  $\text{M}^+(\text{Met})$ . If the carboxylic acid moiety in the [N,CO,S] conformation is rotated by 180°, the result is a charge-solvated, tridentate [N,OH,S] conformation. This structure was not included in the previous theoretical results for the CID study of  $\text{M}^+(\text{Met})$  with  $\text{M}^+ = \text{Li}^+, \text{Na}^+, \text{and } \text{K}^+$ , because it is always higher in energy than the [N,CO,S] conformer and could not correspond to the ground state. Only the lowest energy [N,OH,S] orientations, either tgggt or ttggt, are presented in Tables 1 and 3, and are analogous to the tgcgt and tgggg orientations of the [N,CO,S] conformer. Compared to the cation-oxygen interaction of the [N,CO,S] conformers, the metal cation interaction with the hydroxyl oxygen atom of the [N,OH,S] conformers is weaker; therefore, the  $\text{M}^+\text{-O}$  distances are longer in the latter and compensated by shorter  $\text{M}^+\text{-N}$  and  $\text{M}^+\text{-S}$  distances.

If the metal cation interaction with the side chain is lost from [N,CO,S], the charge-solvated bidentate [N,CO] conformation is obtained, and this has a tgtgt side-chain orientation. The loss of the  $\text{M}^+\text{-S}$  interaction is partially compensated by allowing the amine group to form a hydrogen bond with the side-chain sulfur atom, Figure 2. As expected, the  $\text{M}^+\text{-O}$  and  $\text{M}^+\text{-N}$  distances in the bidentate [N,CO] conformation are shorter than those in the tridentate [N,CO,S] conformation. An additional high energy conformer is charge-solvated and binds in a bidentate fashion to the carbonyl oxygen atom of the backbone and the sulfur atom of the side chain, [CO,S]. The side chain has a ctggg orientation for  $\text{Li}^+(\text{Met})$  to  $\text{Rb}^+(\text{Met})$  and a ctgtg orientation

for  $\text{Cs}^+(\text{Met})$ , as the CCCS dihedral progresses smoothly from  $106^\circ$  to  $117^\circ$  to  $121^\circ$  to  $130^\circ$  to  $140^\circ$  from  $\text{Li}^+(\text{Met})$  to  $\text{Cs}^+(\text{Met})$ . Because the carboxylic hydrogen is trans with respect to the carbonyl oxygen atom, the hydroxyl group hydrogen bonds to the nitrogen atom of the amine group. Because the metal cation is no longer constrained to bind to the other oxygen, the  $\text{M}^+\text{-OC}$  bond lengths are the shortest of any conformation, Table S2.

The final high-energy conformations are the  $[\text{CO}_2^-,\text{S}]$  cgggg conformations, tridentate zwitterionic analogues of charge-solvated  $[\text{COOH},\text{S}]$  cgggg conformations. Minimal comparisons can be made between these zwitterionic and charge-solvated conformers for  $\text{Li}^+(\text{Met})$  as the  $[\text{COOH},\text{S}]$  cgggg structure collapses to a  $[\text{CO},\text{S}]$  structure and the  $[\text{CO}_2^-,\text{S}]$  cgggg conformer for  $\text{Cs}^+(\text{Met})$  collapses to the a high energy  $[\text{CO}_2^-]$  conformer with CCCS and CCSC dihedral angles that position the terminal methyl group closer to the metal binding site. For  $\text{M}^+ = \text{Na}^+, \text{K}^+, \text{and Rb}^+$ , the zwitterionic  $[\text{CO}_2^-,\text{S}]$  cgggg structure has shorter  $\text{M}^+\text{-OC}$  (by  $0.01 - 0.03 \text{ \AA}$ ) and  $\text{M}^+\text{-O}$  (by  $0.14 - 0.15 \text{ \AA}$ ) distances and longer  $\text{M}^+\text{-S}$  distances than the analogous  $[\text{COOH},\text{S}]$  conformations.

Finally, the protonated methionine complex,  $\text{H}^+(\text{Met})$ , has a set of low energy structures,  $[\text{N},\text{CO},\text{S}]$ , in which the protonated amine group hydrogen bonds to both the carbonyl oxygen atom ( $\text{NH}\cdots\text{OC}$ ) and the sulfur atom of the amino acid side chain ( $\text{NH}\cdots\text{S}$ ). A third hydrogen bond is also present between the hydroxyl group and the carbonyl oxygen atom. Four structures having this bonding motif vary in the side-chain orientations: tgtgg, tgtgt, tgggg, and tgggt. The  $\text{NH}\cdots\text{OC}$  hydrogen bond is longer by  $0.085 \text{ \AA}$  for the tgtgg (tgtgt) structures compared to the tgggg (tgggt) orientations. A second set of structures were identified with the carboxylic acid group rotated by  $\sim 180^\circ$  such that a hydrogen bond forms between the hydrogen atom on the amine group and hydroxyl group oxygen atom,  $[\text{N},\text{OH},\text{S}]$ . The  $[\text{N},\text{OH},\text{S}]$  tgtgg, ttggg, tgtgt, and ttggt orientations are direct analogues of the  $[\text{N},\text{CO},\text{S}]$  tgtgg, tgggg, tgtgt, and tgggt orientations.

One final observation regarding the structures in which the metal cation binds to the sulfur side chain is the  $\angle\text{M-C-S-C}$  dihedral angle. For most of the  $[\text{N},\text{CO},\text{S}]$  conformers, these dihedral angles are near  $120^\circ$ , indicating that the metal ion prefers to bind in a tetrahedral-like

geometry as opposed to a planar geometry that would be favored by aligning with the local dipole moment of the sulfur group. As the metal ion gets larger, these dihedral angles do increase for the tgcgg and tgggg orientations, reaching 171° and 153° respectively. For the [COOH,S] conformers, the tetrahedral-like geometry is also preferred for the metal cations with the cgggg orientation; however, for the cgggt and cgcgg orientations, these dihedral angles also increase as the metal cation size increases, reaching 167° and 151°, respectively. Notably such tetrahedral-like side-chain geometries differ from those calculated for oxygen side-chains (serine and threonine) which favor a much more planar dihedral angle,<sup>2,3</sup> even though the longer side-chain length of Met allows greater flexibility in its coordination geometry.

(1) Wilson, R. G.; Brewer, G. R. *Ion Beams with Applications to Ion Implantation*; Wiley: New York, 1973.

(2) Armentrout, P. B.; Rodgers, M. T.; Oomens, J.; Steill, J. D. *J. Phys. Chem. A* **2008**, *112*, 2248.

(3) Rodgers, M. T.; Armentrout, P. B.; Oomens, J.; Steill, J. D. *J. Phys. Chem. A* **2008**, *112*, 2258.

### Figure Caption

Figure S1. 298 K Gibbs free energies (kJ/mol) calculated at the B3LYP (a) and B3P86 (b) levels of theory (from Table 1) of eight conformations of  $M^+(\text{Met})$  complexes as a function of the alkali-metal cation relative to the energy of the [N,CO,S] conformer.

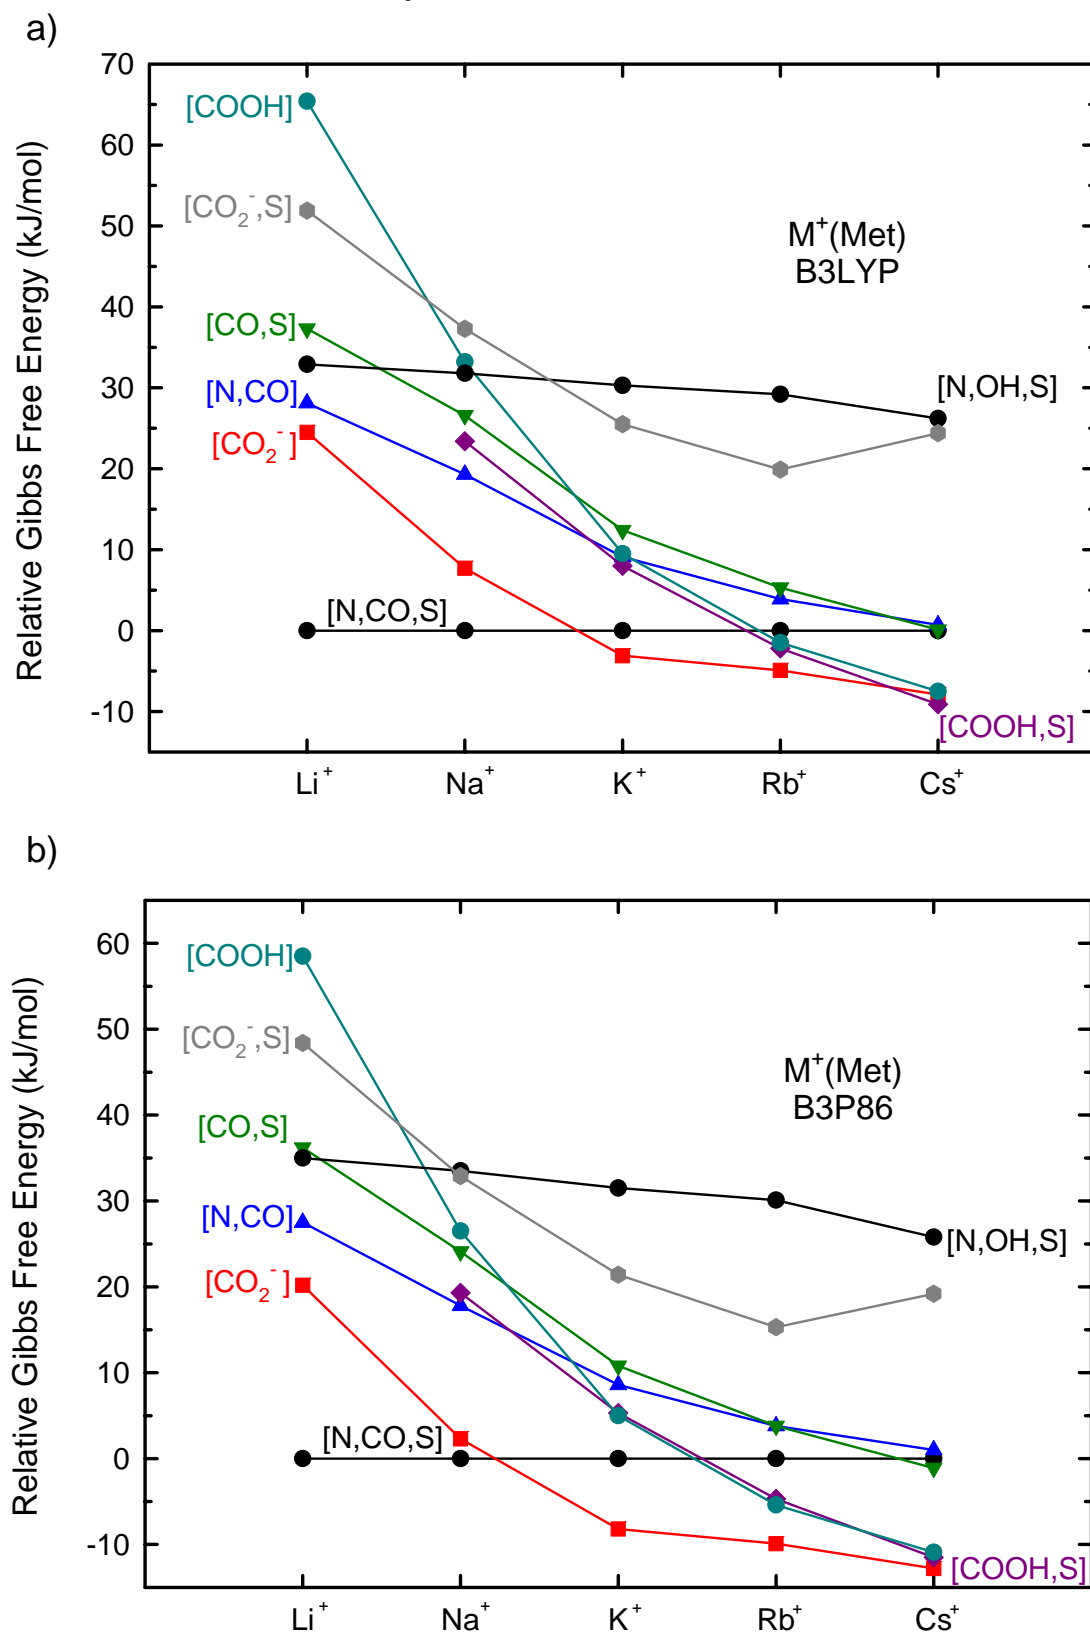

Figure S1



**TABLE S1: Relative energies at 0 K (kJ/mol) of low-lying conformations of cationized Met calculated using different basis sets<sup>a</sup>**

| Complex               | Structure                              | HW*/6-311+G(2d,2p)     | Def2TZVP              |
|-----------------------|----------------------------------------|------------------------|-----------------------|
| Rb <sup>+</sup> (Met) | [CO <sub>2</sub> <sup>-</sup> ]ctggg   | <b>0.0, 0.0</b> , 1.7  | <b>0.0, 0.0</b> , 0.2 |
|                       | [N,CO,S]tggt                           | 5.0, 10.0, 0.9         | 2.6, 7.4, <b>0.0</b>  |
|                       | [COOH]ctggg                            | 6.4, 7.5, 8.4          | 7.4, 8.2, 9.8         |
|                       | [COOH,S]cgggt                          | 6.6, 9.1, 3.9          | 6.2, 8.3, 3.0         |
|                       | [COOH,S]cgggg                          | 7.2, 9.4, 1.4          | 7.3, 9.1, 1.9         |
|                       | [N,CO,S]tgggg                          | 10.1, 13.9, <b>0.0</b> | 8.3, 12.0, 0.4        |
|                       | [N,CO]tgtgt                            | 12.5, 17.4, 13.3       | 11.2, 16.0, 14.2      |
|                       | [CO,S]ctggg                            | 13.0, 16.5, 16.4       | 12.3, 15.5, 16.3      |
|                       | [CO <sub>2</sub> <sup>-</sup> ,S]cgggg | 28.7, 29.1, 23.7       | 27.4, 27.4, 19.3      |
|                       | [N,OH,S]ttggg                          | 34.0, 37.9, 19.9       | 33.1, 37.0, 21.9      |
|                       | [N,OH,S]tggt                           | 35.2, 41.2, 28.6       | 33.5, 39.3, 29.3      |
| Cs <sup>+</sup> (Met) | [CO <sub>2</sub> <sup>-</sup> ]ctggg   | <b>0.0, 0.0</b> , 3.2  | <b>0.0, 0.0</b> , 0.4 |
|                       | [COOH]ctggg                            | 1.5, 3.1, 4.7          | 4.6, 6.2, 7.1         |
|                       | [COOH,S]ctggt                          | 2.5, 5.0, 1.2          | 4.4, 6.6, 0.6         |
|                       | [COOH,S]cgggg                          | 4.2, 6.7, 0.4          | 6.3, 8.5, 0.5         |
|                       | [N,CO,S]tggt                           | 7.2, 12.2, 3.7         | 5.4, 9.9, 1.4         |
|                       | [N,CO,S]tgggg                          | 9.3, 13.2, <b>0.0</b>  | 9.3, 13.1, <b>0.0</b> |
|                       | [CO,S]ctgtg                            | 9.4, 13.1, 13.3        | 11.4, 15.1, 14.0      |
|                       | [N,CO]tgtgt                            | 11.0, 16.2, 12.5       | 11.1, 16.1, 13.6      |
|                       | [CO <sub>2</sub> <sup>-</sup> ,S]cgggg | 30.1, 31.1, 27.7       | 29.0, 29.7, 21.0      |
|                       | [N,OH,S]ttggg                          | 32.9, 36.7, 19.8       | 33.6, 37.3, 20.7      |
|                       | [N,OH,S]tggt                           | 36.0, 41.7, 30.8       | 35.2, 40.6, 29.9      |

<sup>a</sup> Values listed are calculated at the B3LYP, B3P86, and MP2(full) levels of theory using the indicated basis set. For the Def2TZVP basis set on all elements, geometries, and zero-point energies were calculated at the B3LYP/Def2TZVP level of theory.

Supplementary Material (ESI) for *PCCP*  
This journal is © the Owner Societies 2010

**TABLE S2: Geometric parameters for low-energy structures of  $M^+(\text{Met})^a$**

| conformer<br>orientation                   | $r(M^+-O)$ (Å) |       |       |              |              | $r(M^+-X)$ (Å) |       |       |              |              | $r(M^+-S)$ (Å) |       |       |              |              |
|--------------------------------------------|----------------|-------|-------|--------------|--------------|----------------|-------|-------|--------------|--------------|----------------|-------|-------|--------------|--------------|
|                                            | Li             | Na    | K     | Rb           | Cs           | Li             | Na    | K     | Rb           | Cs           | Li             | Na    | K     | Rb           | Cs           |
| [N,CO,S] <sup>b</sup><br>tgcgt             | 1.938          | 2.293 | 2.631 | 2.888        | 3.106        | 2.068          | 2.462 | 2.885 | 3.178        | 3.445        | 2.439          | 2.802 | 3.229 | 3.516        | 3.781        |
| [N,CO,S] <sup>b</sup><br>tgcgg             | 1.941          | 2.299 | 2.634 | 2.887        | 3.084        | 2.054          | 2.443 | 2.858 | 3.149        | 3.419        | 2.451          | 2.811 | 3.254 | 3.549        | 3.934        |
| [N,CO,S] <sup>b</sup><br>tgggt             | 1.926          | 2.279 | 2.612 | 2.859        | 3.079        | 2.090          | 2.485 | 2.933 | 3.249        | 3.521        | 2.464          | 2.826 | 3.265 | 3.548        | 3.806        |
| [N,CO,S] <sup>b</sup><br>tgggg             | 1.923          | 2.275 | 2.608 | 2.862        | 3.082        | 2.085          | 2.483 | 2.941 | 3.255        | 3.550        | 2.448          | 2.835 | 3.273 | 3.566        | 3.795        |
| [N,OH,S] <sup>b</sup><br>tgggt             | 1.974          | 2.349 | 2.750 | 3.021        | 3.287        | 2.027          | 2.413 | 2.815 | 3.103        | 3.358        | 2.419          | 2.770 | 3.181 | 3.468        | 3.720        |
| [N,OH,S] <sup>b</sup><br>ttggg             | 1.975          | 2.362 | 2.760 | 3.044        | 3.328        | 2.040          | 2.429 | 2.851 | 3.142        | 3.412        | 2.447          | 2.811 | 3.219 | 3.476        | 3.697        |
| [N,CO] <sup>b</sup><br>tgtgt               | 1.871          | 2.250 | 2.608 | 2.869        | 3.092        | 2.022          | 2.411 | 2.839 | 3.130        | 3.385        |                |       |       |              |              |
| [CO <sub>2</sub> ] <sup>c</sup><br>ctggg   | 1.927          | 2.286 | 2.620 | 2.886        | 3.111        | 1.950          | 2.308 | 2.672 | 2.936        | 3.154        |                |       |       |              |              |
| [CO <sub>2</sub> ] <sup>c</sup><br>ctggt   | 1.923          | 2.280 | 2.618 | 2.882        | 3.085        | 1.952          | 2.314 | 2.673 | 2.943        | 3.189        |                |       |       |              |              |
| [CO <sub>2</sub> ] <sup>c</sup><br>cgtgg   | 1.920          | 2.277 | 2.611 | 2.872        | 3.090        | 1.957          | 2.314 | 2.682 | 2.953        | 3.168        |                |       |       |              |              |
| [COOH] <sup>d</sup><br>ctggg               | 1.919          | 2.292 | 2.648 | 2.906        | 3.149        | 2.064          | 2.410 | 2.826 | 3.108        | 3.313        |                |       |       |              |              |
| [COOH] <sup>d</sup><br>ctggt               | 1.906          | 2.290 | 2.639 | 2.905        | 3.129        | 2.080          | 2.411 | 2.832 | 3.111        | 3.367        |                |       |       |              |              |
| [COOH] <sup>d</sup><br>cgtgg               | 1.913          | 2.282 | 2.630 | 2.906        | 3.124        | 2.076          | 2.431 | 2.848 | 3.116        | 3.349        |                |       |       |              |              |
| [COOH,S] <sup>d</sup><br>cgggg             | <sup>e</sup>   | 2.316 | 2.655 | 2.912        | 3.130        | <sup>e</sup>   | 2.476 | 2.822 | 3.055        | 3.283        | <sup>e</sup>   | 2.921 | 3.433 | 3.796        | 4.125        |
| [CO <sub>2</sub> ,S] <sup>c</sup><br>cgggg | 1.964          | 2.303 | 2.629 | 2.891        | <sup>f</sup> | 1.989          | 2.331 | 2.680 | 2.921        | <sup>f</sup> | 2.580          | 3.063 | 3.529 | 4.121        | <sup>f</sup> |
| [COOH,S] <sup>d</sup><br>cgcgg             | <sup>e</sup>   | 2.266 | 2.628 | 2.877        | 3.098        | <sup>e</sup>   | 2.715 | 2.929 | 3.207        | 3.451        | <sup>e</sup>   | 2.880 | 3.366 | 3.672        | 3.919        |
| [CO <sub>2</sub> ,S] <sup>c</sup><br>cgcgg | 1.949          | 2.292 | 2.608 | 2.860        | 3.067        | 2.018          | 2.364 | 2.722 | 3.000        | 3.239        | 2.580          | 3.030 | 3.530 | 3.855        | 4.090        |
|                                            |                |       |       | <b>2.825</b> | <b>2.991</b> |                |       |       | <b>3.116</b> | <b>3.301</b> |                |       |       | <b>3.433</b> | <b>3.623</b> |
|                                            |                |       |       | <b>2.828</b> | <b>2.981</b> |                |       |       | <b>3.088</b> | <b>3.264</b> |                |       |       | <b>3.454</b> | <b>3.694</b> |
|                                            |                |       |       | <b>2.794</b> | <b>2.957</b> |                |       |       | <b>3.185</b> | <b>3.366</b> |                |       |       | <b>3.467</b> | <b>3.661</b> |
|                                            |                |       |       | <b>2.800</b> | <b>2.959</b> |                |       |       | <b>3.191</b> | <b>3.396</b> |                |       |       | <b>3.473</b> | <b>3.642</b> |
|                                            |                |       |       | <b>2.989</b> | <b>3.186</b> |                |       |       | <b>3.040</b> | <b>3.219</b> |                |       |       | <b>3.381</b> | <b>3.563</b> |
|                                            |                |       |       | <b>2.998</b> | <b>3.209</b> |                |       |       | <b>3.082</b> | <b>3.274</b> |                |       |       | <b>3.339</b> | <b>3.547</b> |
|                                            |                |       |       | <b>2.806</b> | <b>2.972</b> |                |       |       | <b>3.061</b> | <b>3.235</b> |                |       |       |              |              |
|                                            |                |       |       | <b>2.811</b> | <b>2.951</b> |                |       |       | <b>2.871</b> | <b>3.039</b> |                |       |       |              |              |
|                                            |                |       |       | <b>2.801</b> | <b>2.936</b> |                |       |       | <b>2.881</b> | <b>3.060</b> |                |       |       |              |              |
|                                            |                |       |       | <b>2.795</b> | <b>2.937</b> |                |       |       | <b>2.888</b> | <b>3.049</b> |                |       |       |              |              |
|                                            |                |       |       | <b>2.830</b> | <b>2.985</b> |                |       |       | <b>3.064</b> | <b>3.273</b> |                |       |       |              |              |
|                                            |                |       |       | <b>2.825</b> | <b>2.972</b> |                |       |       | <b>3.074</b> | <b>3.315</b> |                |       |       |              |              |
|                                            |                |       |       | <b>2.823</b> | <b>2.968</b> |                |       |       | <b>3.067</b> | <b>3.317</b> |                |       |       |              |              |
|                                            |                |       |       | <b>2.834</b> | <b>2.981</b> |                |       |       | <b>3.026</b> | <b>3.241</b> |                |       |       |              |              |
|                                            |                |       |       | <b>2.814</b> | <sup>f</sup> |                |       |       | <b>2.864</b> | <sup>f</sup> |                |       |       | <b>3.908</b> | <sup>f</sup> |
|                                            |                |       |       | <b>2.802</b> | <b>2.961</b> |                |       |       | <b>3.253</b> | <b>3.415</b> |                |       |       | <b>3.547</b> | <b>3.727</b> |
|                                            |                |       |       | <b>2.785</b> | <b>2.920</b> |                |       |       | <b>2.941</b> | <b>3.131</b> |                |       |       | <b>3.729</b> | <b>3.902</b> |

Supplementary Material (ESI) for *PCCP*  
This journal is © the Owner Societies 2010

|                                                |          |       |       |              |              |          |       |       |              |              |          |       |       |              |              |
|------------------------------------------------|----------|-------|-------|--------------|--------------|----------|-------|-------|--------------|--------------|----------|-------|-------|--------------|--------------|
| [COOH,S] <sup>d</sup>                          | <i>e</i> | 2.287 | 2.620 | 2.872        | 3.066        | <i>e</i> | 2.574 | 2.918 | 3.151        | 3.475        | <i>e</i> | 2.902 | 3.401 | 3.806        | 4.326        |
| cgggt                                          |          |       |       | <b>2.799</b> | <b>2.915</b> |          |       |       | <b>3.117</b> | <b>3.480</b> |          |       |       | <b>3.641</b> | <b>3.944</b> |
| [CO <sub>2</sub> <sup>-</sup> ,S] <sup>c</sup> | 1.949    | 2.290 | 2.604 | 2.857        | <i>f</i>     | 2.014    | 2.361 | 2.713 | 2.964        | <i>f</i>     | 2.583    | 3.029 | 3.568 | 4.179        | <i>f</i>     |
| cgggt                                          |          |       |       | <b>2.783</b> | <i>f</i>     |          |       |       | <b>2.901</b> | <i>f</i>     |          |       |       | <b>4.010</b> | <i>f</i>     |
| [CO,S]                                         | 1.780    | 2.156 | 2.505 | 2.765        | 2.994        |          |       |       |              |              | 2.429    | 2.835 | 3.337 | 3.681        | 3.991        |
| ctggg                                          |          |       |       | <b>2.703</b> | <b>2.875</b> |          |       |       |              |              |          |       |       | <b>3.561</b> | <b>3.768</b> |

| conformer orientation                          | ∠XMO (°) |      |      |             |             | ∠XMS (°) |      |      |             |             | ∠OMS (°) |      |      |             |             |
|------------------------------------------------|----------|------|------|-------------|-------------|----------|------|------|-------------|-------------|----------|------|------|-------------|-------------|
|                                                | Li       | Na   | K    | Rb          | Cs          | Li       | Na   | K    | Rb          | Cs          | Li       | Na   | K    | Rb          | Cs          |
| [N,CO,S] <sup>b</sup>                          | 84.6     | 71.1 | 60.3 | 54.5        | 50.0        | 90.1     | 76.3 | 64.1 | 58.1        | 53.0        | 109.9    | 99.1 | 86.2 | 80.0        | 74.7        |
| tgggt                                          |          |      |      | <b>55.7</b> | <b>52.2</b> |          |      |      | <b>59.2</b> | <b>55.6</b> |          |      |      | <b>81.1</b> | <b>76.8</b> |
| [N,CO,S] <sup>b</sup>                          | 87.7     | 71.2 | 60.6 | 54.9        | 51.1        | 98.5     | 84.9 | 70.2 | 62.7        | 53.0        | 103.5    | 94.2 | 82.9 | 77.3        | 71.5        |
| tgagg                                          |          |      |      | <b>56.1</b> | <b>53.1</b> |          |      |      | <b>64.6</b> | <b>58.5</b> |          |      |      | <b>78.6</b> | <b>74.7</b> |
| [N,CO,S] <sup>b</sup>                          | 84.0     | 70.2 | 59.0 | 53.1        | 48.7        | 98.6     | 86.3 | 73.9 | 67.4        | 62.7        | 96.8     | 84.1 | 72.2 | 65.7        | 61.3        |
| tgggt                                          |          |      |      | <b>54.3</b> | <b>50.9</b> |          |      |      | <b>68.7</b> | <b>65.1</b> |          |      |      | <b>67.2</b> | <b>63.9</b> |
| [N,CO,S] <sup>b</sup>                          | 84.7     | 70.5 | 58.6 | 52.6        | 48.0        | 96.7     | 85.0 | 72.8 | 66.8        | 62.1        | 106.1    | 91.4 | 77.5 | 70.6        | 64.8        |
| tgggg                                          |          |      |      | <b>53.7</b> | <b>50.3</b> |          |      |      | <b>68.2</b> | <b>64.4</b> |          |      |      | <b>72.1</b> | <b>68.0</b> |
| [N,OH,S] <sup>b</sup>                          | 82.6     | 69.2 | 58.2 | 52.7        | 47.9        | 92.8     | 79.4 | 66.8 | 60.1        | 55.1        | 110.5    | 99.6 | 87.4 | 80.9        | 76.7        |
| tgggt                                          |          |      |      | <b>53.3</b> | <b>49.8</b> |          |      |      | <b>61.8</b> | <b>57.6</b> |          |      |      | <b>82.8</b> | <b>79.1</b> |
| [N,OH,S] <sup>b</sup>                          | 81.1     | 67.5 | 56.8 | 51.3        | 46.8        | 98.7     | 86.6 | 74.2 | 68.3        | 63.3        | 106.0    | 92.4 | 78.3 | 71.7        | 66.1        |
| ttggg                                          |          |      |      | <b>52.2</b> | <b>48.7</b> |          |      |      | <b>69.8</b> | <b>65.8</b> |          |      |      | <b>73.6</b> | <b>69.0</b> |
| [N,CO] <sup>b</sup>                            | 87.8     | 73.0 | 61.3 | 55.4        | 51.0        |          |      |      |             |             |          |      |      |             |             |
| tgtgt                                          |          |      |      | <b>56.7</b> | <b>53.3</b> |          |      |      |             |             |          |      |      |             |             |
| [CO <sub>2</sub> <sup>-</sup> ] <sup>c</sup>   | 69.8     | 58.3 | 50.2 | 45.5        | 42.4        |          |      |      |             |             |          |      |      |             |             |
| ctggg                                          |          |      |      | <b>46.6</b> | <b>44.1</b> |          |      |      |             |             |          |      |      |             |             |
| [CO <sub>2</sub> <sup>-</sup> ] <sup>c</sup>   | 69.9     | 58.3 | 50.2 | 45.5        | 42.1        |          |      |      |             |             |          |      |      |             |             |
| ctggt                                          |          |      |      | <b>46.6</b> | <b>44.0</b> |          |      |      |             |             |          |      |      |             |             |
| [CO <sub>2</sub> <sup>-</sup> ] <sup>c</sup>   | 69.9     | 58.4 | 50.3 | 45.6        | 42.2        |          |      |      |             |             |          |      |      |             |             |
| cgtgg                                          |          |      |      | <b>46.6</b> |             |          |      |      |             |             |          |      |      |             |             |
| [COOH] <sup>d</sup>                            | 66.9     | 56.1 | 47.6 | 43.2        | 40.2        |          |      |      |             |             |          |      |      |             |             |
| ctggg                                          |          |      |      | <b>44.0</b> | <b>41.3</b> |          |      |      |             |             |          |      |      |             |             |
| [COOH] <sup>d</sup>                            | 66.9     | 56.1 | 47.7 | 43.2        | 39.8        |          |      |      |             |             |          |      |      |             |             |
| ctggt                                          |          |      |      | <b>44.0</b> | <b>40.9</b> |          |      |      |             |             |          |      |      |             |             |
| [COOH] <sup>d</sup>                            | 66.8     | 55.9 | 47.6 | 43.2        | 40.0        |          |      |      |             |             |          |      |      |             |             |
| cgtgg                                          |          |      |      | <b>44.1</b> | <b>40.9</b> |          |      |      |             |             |          |      |      |             |             |
| [COOH,S] <sup>d</sup>                          | <i>e</i> | 54.9 | 47.7 | 43.7        | 40.5        | <i>e</i> | 80.9 | 69.6 | 62.8        | 57.8        | <i>e</i> | 83.2 | 70.5 | 63.8        | 58.3        |
| cgggg                                          |          |      |      | <b>44.4</b> | <b>41.6</b> |          |      |      | <b>64.5</b> | <b>61.0</b> |          |      |      | <b>66.6</b> | <b>62.6</b> |
| [CO <sub>2</sub> <sup>-</sup> ,S] <sup>c</sup> | 68.7     | 58.0 | 50.2 | 45.7        | <i>f</i>    | 93.8     | 79.8 | 69.4 | 60.9        | <i>f</i>    | 93.8     | 78.6 | 68.4 | 57.2        | <i>f</i>    |

Supplementary Material (ESI) for *PCCP*  
This journal is © the Owner Societies 2010

|                                                |          |      |      |             |             |          |      |      |             |             |          |      |      |             |             |
|------------------------------------------------|----------|------|------|-------------|-------------|----------|------|------|-------------|-------------|----------|------|------|-------------|-------------|
| cgggg                                          |          |      |      | <b>46.8</b> | <i>f</i>    |          |      |      | <b>63.8</b> | <i>f</i>    |          |      |      | <b>60.9</b> | <i>f</i>    |
| [COOH,S] <sup>d</sup>                          | <i>e</i> | 51.8 | 46.7 | <i>42.4</i> | <i>39.2</i> | <i>e</i> | 86.2 | 75.8 | <i>69.2</i> | <i>64.4</i> | <i>e</i> | 76.5 | 64.3 | <i>58.4</i> | <i>54.3</i> |
| cgcg                                           |          |      |      | <b>42.2</b> | <b>39.9</b> |          |      |      | <b>70.7</b> | <b>67.0</b> |          |      |      | <b>60.6</b> | <b>57.2</b> |
| [CO <sub>2</sub> <sup>-</sup> ,S] <sup>c</sup> | 68.5     | 57.7 | 50.0 | <i>45.2</i> | <i>41.9</i> | 100.2    | 86.7 | 75.7 | <i>69.7</i> | <i>65.8</i> | 86.4     | 72.1 | 60.9 | <i>54.9</i> | <i>51.5</i> |
| cgcg                                           |          |      |      | <b>46.3</b> | <b>43.6</b> |          |      |      | <b>72.0</b> | <b>68.6</b> |          |      |      | <b>57.2</b> | <b>54.3</b> |
| [COOH,S] <sup>d</sup>                          | <i>e</i> | 53.8 | 46.9 | <i>43.0</i> | <i>39.1</i> | <i>e</i> | 82.9 | 71.3 | <i>64.0</i> | <i>56.4</i> | <i>e</i> | 80.2 | 67.5 | <i>59.6</i> | <i>51.3</i> |
| cggt                                           |          |      |      | <b>43.7</b> | <b>39.4</b> |          |      |      | <b>66.5</b> | <b>60.3</b> |          |      |      | <b>62.5</b> | <b>56.4</b> |
| [CO <sub>2</sub> <sup>-</sup> ,S] <sup>c</sup> | 68.5     | 57.8 | 50.1 | <i>45.6</i> | <i>f</i>    | 95.9     | 82.6 | 70.9 | <i>61.0</i> | <i>f</i>    | 89.1     | 75.5 | 63.9 | <i>53.8</i> | <i>f</i>    |
| cggt                                           |          |      |      | <b>46.6</b> | <i>f</i>    |          |      |      | <b>63.4</b> | <i>f</i>    |          |      |      | <b>56.2</b> | <i>f</i>    |
| [CO,S]                                         |          |      |      |             |             |          |      |      |             |             | 105.3    | 90.4 | 76.5 | <i>71.2</i> | <i>68.6</i> |
| ctgg                                           |          |      |      |             |             |          |      |      |             |             |          |      |      | <b>73.2</b> | <b>70.1</b> |

<sup>a</sup> Values calculated at the B3LYP/6-311+G(d,p) (roman), B3LYP/HW\*/6-311+G(d,p) (italics), or B3LYP/Def2TZVP (bold) levels of theory for the lowest energy structure of a given conformer of each metal. The O atom for the M<sup>+</sup>-O bond distances and the XMO and OMS bond angles refers to the carbonyl oxygen atom, except for [N,OH,S] conformers. <sup>b</sup> X = amino nitrogen. <sup>c</sup> X = carboxylate oxygen atom bound to NH<sub>3</sub><sup>+</sup> by a hydrogen bond. <sup>d</sup> X = hydroxyl oxygen atom. <sup>e</sup> The [COOH,S] conformer for Li<sup>+</sup>(Met) collapses to a [CO,S] conformer. <sup>f</sup> [CO<sub>2</sub><sup>-</sup>,S]cggg conformer for Cs<sup>+</sup>(Met) converges to a [CO<sub>2</sub><sup>-</sup>] conformer.

**Table S3: Side-chain dihedral angles (°) for the [N,CO,S], [CO<sub>2</sub><sup>-</sup>], and [COOH] conformers for Li<sup>+</sup>(Met) to Cs<sup>+</sup>(Met) and the [COOH,S] conformers for Na<sup>+</sup>(Met) to Cs<sup>+</sup>(Met)<sup>a</sup>**

| Complex               | Conformer | Orientation | ∠ (HOCC) | ∠ (OCCC) | ∠ (CCCC) | ∠ (CCCS) | ∠ (CCSC) |
|-----------------------|-----------|-------------|----------|----------|----------|----------|----------|
| Li <sup>+</sup> (Met) | [N,CO,S]  | tgcgt       | 177.9    | -81.6    | -45.6    | -63.3    | -179.0   |
| Na <sup>+</sup> (Met) |           | tgcgt       | 178.1    | -77.8    | -49.6    | -67.4    | -167.9   |
| K <sup>+</sup> (Met)  |           | tgcgt       | 178.6    | -73.5    | -52.0    | -67.9    | -159.8   |
| Rb <sup>+</sup> (Met) |           | tgcgt       | 178.9    | -71.6    | -53.6    | -69.8    | -154.3   |
| Cs <sup>+</sup> (Met) |           | tgcgt       | 179.2    | -70.2    | -55.8    | -70.0    | -148.0   |
| Li <sup>+</sup> (Met) | [N,CO,S]  | tgcgg       | 177.9    | -80.8    | -40.1    | -59.2    | -68.6    |
| Na <sup>+</sup> (Met) |           | tgcgg       | 178.4    | -76.4    | -41.0    | -65.3    | -66.7    |
| K <sup>+</sup> (Met)  |           | tgcgg       | 178.7    | -72.5    | -44.4    | -67.3    | -69.2    |
| Rb <sup>+</sup> (Met) |           | tgcgg       | 178.7    | -71.9    | -47.8    | -70.2    | -75.5    |
| Cs <sup>+</sup> (Met) |           | tgcgg       | 177.9    | -74.4    | -56.7    | -70.3    | -92.0    |
| Li <sup>+</sup> (Met) | [N,CO,S]  | tgggt       | 178.2    | -75.1    | -90.2    | 59.0     | 180.0    |
| Na <sup>+</sup> (Met) |           | tgggt       | 179.5    | -68.2    | -86.1    | 61.4     | 167.9    |
| K <sup>+</sup> (Met)  |           | tgggt       | -179.7   | -63.7    | -82.4    | 62.9     | 159.0    |
| Rb <sup>+</sup> (Met) |           | tgggt       | -179.6   | -62.3    | -80.5    | 63.6     | 151.1    |
| Cs <sup>+</sup> (Met) |           | tgggt       | -179.3   | -60.6    | -79.3    | 64.9     | 148.1    |
| Li <sup>+</sup> (Met) | [N,CO,S]  | tgggg       | 179.3    | -76.8    | -95.6    | 55.3     | 67.0     |
| Na <sup>+</sup> (Met) |           | tgggg       | -177.3   | -64.3    | -89.2    | 57.4     | 63.8     |
| K <sup>+</sup> (Met)  |           | tgggg       | -174.3   | -53.4    | -81.4    | 58.4     | 69.4     |
| Rb <sup>+</sup> (Met) |           | tgggg       | -173.8   | -51.6    | -78.9    | 60.2     | 70.2     |

Supplementary Material (ESI) for *PCCP*  
 This journal is © the Owner Societies 2010

|                       |                                 |       |        |       |       |       |       |
|-----------------------|---------------------------------|-------|--------|-------|-------|-------|-------|
| Cs <sup>+</sup> (Met) |                                 | tgggg | -173.9 | -51.5 | -77.5 | 61.5  | 71.8  |
| Li <sup>+</sup> (Met) | [CO <sub>2</sub> <sup>-</sup> ] | ctggg | -3.5   | 137.6 | -57.4 | -65.8 | -77.4 |
| Na <sup>+</sup> (Met) |                                 | ctggg | -3.9   | 137.2 | -57.6 | -67.0 | -76.9 |
| K <sup>+</sup> (Met)  |                                 | ctggg | -3.6   | 135.5 | -58.6 | -68.3 | -76.5 |
| Rb <sup>+</sup> (Met) |                                 | ctggg | -4.2   | 136.1 | -57.8 | -68.1 | -76.8 |
| Cs <sup>+</sup> (Met) |                                 | ctggg | -4.1   | 135.9 | -57.2 | -68.2 | -76.8 |
| Li <sup>+</sup> (Met) | [CO <sub>2</sub> <sup>-</sup> ] | ctggt | -2.8   | 136.6 | -62.3 | -75.1 | 159.5 |
| Na <sup>+</sup> (Met) |                                 | ctggt | -3.3   | 136.5 | -62.4 | -76.2 | 160.5 |
| K <sup>+</sup> (Met)  |                                 | ctggt | -3.6   | 136.1 | -62.5 | -76.6 | 160.4 |
| Rb <sup>+</sup> (Met) |                                 | ctggt | -3.8   | 136.0 | -62.5 | -76.9 | 161.0 |
| Cs <sup>+</sup> (Met) |                                 | cgggt | -3.0   | 134.5 | -62.4 | -77.3 | 160.9 |
| Li <sup>+</sup> (Met) | [CO <sub>2</sub> <sup>-</sup> ] | cgtgg | -0.1   | 110.3 | 175.2 | 68.5  | 77.9  |
| Na <sup>+</sup> (Met) |                                 | cgtgg | 1.2    | 109.7 | 176.0 | 69.7  | 76.3  |
| K <sup>+</sup> (Met)  |                                 | cgtgg | 1.5    | 110.9 | 176.8 | 70.6  | 76.9  |
| Rb <sup>+</sup> (Met) |                                 | cgtgg | 1.7    | 111.1 | 176.9 | 71.0  | 77.6  |
| Cs <sup>+</sup> (Met) |                                 | cgtgg | 1.8    | 112.0 | 178.0 | 71.3  | 77.4  |
| Li <sup>+</sup> (Met) | [COOH]                          | ctggg | -2.1   | 135.0 | -59.2 | -66.1 | -76.9 |
| Na <sup>+</sup> (Met) |                                 | ctggg | -2.3   | 136.7 | -58.8 | -66.4 | -76.8 |
| K <sup>+</sup> (Met)  |                                 | ctggg | -2.3   | 137.6 | -58.0 | -66.0 | -76.8 |
| Rb <sup>+</sup> (Met) |                                 | ctggg | -2.5   | 138.1 | -59.1 | -67.0 | -76.0 |
| Cs <sup>+</sup> (Met) |                                 | ctggg | -2.6   | 139.3 | -56.3 | -65.1 | -76.9 |
| Li <sup>+</sup> (Met) | [COOH]                          | cgggt | -2.0   | 134.7 | -66.2 | -77.2 | 172.3 |
| Na <sup>+</sup> (Met) |                                 | ctggt | -2.5   | 137.8 | -65.8 | -76.5 | 173.4 |

Supplementary Material (ESI) for *PCCP*  
 This journal is © the Owner Societies 2010

|                       |          |       |      |              |              |       |               |
|-----------------------|----------|-------|------|--------------|--------------|-------|---------------|
| K <sup>+</sup> (Met)  |          | ctggt | -2.5 | 138.2        | -66.0        | -77.2 | 173.6         |
| Rb <sup>+</sup> (Met) |          | ctggt | -2.5 | <i>138.3</i> | -66.0        | -77.7 | <i>173.6</i>  |
| Cs <sup>+</sup> (Met) |          | ctggt | -2.4 | <i>139.0</i> | -64.4        | -76.7 | <i>173.2</i>  |
| Li <sup>+</sup> (Met) | [COOH]   | cgtgg | 1.5  | 118.3        | 177.0        | 75.5  | 80.0          |
| Na <sup>+</sup> (Met) |          | cgtgg | 1.7  | 117.4        | 174.0        | 75.8  | 80.3          |
| K <sup>+</sup> (Met)  |          | cgtgg | 1.7  | 116.8        | 173.7        | 76.2  | 79.8          |
| Rb <sup>+</sup> (Met) |          | cgtgg | 2.4  | <i>115.4</i> | <i>172.2</i> | 75.3  | 80.0          |
| Cs <sup>+</sup> (Met) |          | cgtgg | 1.9  | <i>117.0</i> | <i>173.3</i> | 76.8  | 79.1          |
| Na <sup>+</sup> (Met) | [COOH,S] | cgggg | 6.6  | 107.1        | -60.4        | -81.9 | 68.5          |
| K <sup>+</sup> (Met)  |          | cgggg | 4.7  | 111.2        | -63.3        | 81.0  | 71.3          |
| Rb <sup>+</sup> (Met) |          | cgggg | 4.1  | <i>112.1</i> | -65.0        | 80.7  | 73.3          |
| Cs <sup>+</sup> (Met) |          | cgggg | 2.9  | <i>114.5</i> | -66.5        | 79.2  | 73.6          |
| Na <sup>+</sup> (Met) | [COOH,S] | cgggt | 5.7  | 109.5        | -59.5        | 87.3  | 176.6         |
| K <sup>+</sup> (Met)  |          | cgggt | 2.7  | 117.3        | -64.5        | 82.4  | 176.1         |
| Rb <sup>+</sup> (Met) |          | cgggt | 0.7  | <i>124.3</i> | -69.0        | 76.6  | <i>179.9</i>  |
| Cs <sup>+</sup> (Met) |          | ctggt | -2.6 | <i>139.7</i> | -77.9        | 62.5  | <i>-174.6</i> |
| Na <sup>+</sup> (Met) | [COOH,S] | cgcgg | 10.2 | 94.1         | 48.2         | -86.1 | -71.5         |
| K <sup>+</sup> (Met)  |          | cgcgg | 8.6  | 97.1         | 47.8         | -87.6 | -77.5         |
| Rb <sup>+</sup> (Met) |          | cgcgg | 8.3  | 98.6         | 47.9         | -88.3 | -78.7         |
| Cs <sup>+</sup> (Met) |          | cgcgg | 7.5  | 99.4         | 47.8         | -88.3 | -80.2         |

<sup>a</sup> Values calculated at the B3LYP/6-311+G(d,p) (roman) and B3LYP/HW\*/6-311+G(d,p) (italics) levels of theory .

**Table S4.** Vibrational frequencies ( $\text{cm}^{-1}$ ) scaled by 0.975 and IR intensities ( $\text{kM/mole}$ ) for the [N,CO,S] tgcgt conformer of  $\text{M}^+(\text{Met})$  calculated at B3LYP/6-311+G(d,p) ( $\text{M}^+ = \text{Li}^+, \text{Na}^+, \text{and K}^+$ ) and B3LYP/HW\*/6-311+G(d,p) ( $\text{M}^+ = \text{Rb}^+ \text{ and } \text{Cs}^+$ ) levels of theory<sup>a</sup>

| $\text{Li}^+(\text{Met})$ |            | $\text{Na}^+(\text{Met})$ |            | $\text{K}^+(\text{Met})$ |            | $\text{Rb}^+(\text{Met})$ |            | $\text{Cs}^+(\text{Met})$ |            |
|---------------------------|------------|---------------------------|------------|--------------------------|------------|---------------------------|------------|---------------------------|------------|
| 54                        | 1          | 46                        | 1          | 40                       | 1          | 37                        | 0.5        | 37                        | 0.3        |
| 88                        | 1          | 75                        | 1          | 64                       | 0.4        | 57                        | 1          | 50                        | 1          |
| 140                       | 1          | 106                       | 7          | 78                       | 5          | 65                        | 3          | 56                        | 2          |
| 146                       | 3          | 120                       | 4          | 100                      | 4          | 88                        | 2          | 78                        | 6          |
| 158                       | 3          | 149                       | 3          | 113                      | 10         | 90                        | 7          | 79                        | 3          |
| 176                       | 0.3        | 161                       | 10         | 144                      | 3          | 119                       | 8          | 103                       | 5          |
| 195                       | 1          | 178                       | 1          | 152                      | 7          | 131                       | 3          | 124                       | 2          |
| 279                       | 9          | 187                       | 4          | 164                      | 16         | 152                       | 0.5        | 151                       | 0.5        |
| 286                       | 14         | 216                       | 12         | 173                      | 3          | 173                       | 0.1        | 170                       | 0.2        |
| 325                       | 8          | 216                       | 26         | 202                      | 2          | 209                       | 1          | 212                       | 2          |
| 351                       | 44         | 287                       | 5          | 271                      | 16         | 254                       | 27         | 245                       | 32         |
| 371                       | 29         | 308                       | 2          | 301                      | 2          | 296                       | 4          | 293                       | 3          |
| 415                       | 18         | 341                       | 15         | 328                      | 19         | 325                       | 18         | 326                       | 21         |
| 453                       | 58         | 401                       | 43         | 369                      | 28         | 358                       | 15         | 355                       | 8          |
| 512                       | 59         | 461                       | 12         | 454                      | 7          | 453                       | 7          | 453                       | 7          |
| 522                       | 27         | 512                       | 10         | 508                      | 10         | 507                       | 9          | 508                       | 9          |
| <b>618</b>                | <b>60</b>  | <b>608</b>                | <b>66</b>  | <b>597</b>               | <b>68</b>  | <b>592</b>                | <b>67</b>  | <b>589</b>                | <b>65</b>  |
| <b>636</b>                | <b>37</b>  | <b>634</b>                | <b>18</b>  | <b>633</b>               | <b>13</b>  | <b>632</b>                | <b>13</b>  | <b>630</b>                | <b>13</b>  |
| <b>679</b>                | <b>76</b>  | <b>666</b>                | <b>72</b>  | <b>656</b>               | <b>69</b>  | <b>650</b>                | <b>66</b>  | <b>647</b>                | <b>63</b>  |
| <b>684</b>                | <b>10</b>  | <b>684</b>                | <b>6</b>   | <b>684</b>               | <b>7</b>   | <b>684</b>                | <b>6</b>   | <b>684</b>                | <b>7</b>   |
| <b>738</b>                | <b>66</b>  | <b>734</b>                | <b>53</b>  | <b>729</b>               | <b>48</b>  | <b>725</b>                | <b>47</b>  | <b>724</b>                | <b>46</b>  |
| <b>814</b>                | <b>8</b>   | <b>812</b>                | <b>9</b>   | <b>811</b>               | <b>12</b>  | <b>809</b>                | <b>14</b>  | <b>806</b>                | <b>18</b>  |
| <b>843</b>                | <b>4</b>   | <b>843</b>                | <b>3</b>   | <b>843</b>               | <b>3</b>   | <b>840</b>                | <b>4</b>   | <b>839</b>                | <b>5</b>   |
| <b>858</b>                | <b>7</b>   | <b>853</b>                | <b>10</b>  | <b>850</b>               | <b>12</b>  | <b>849</b>                | <b>14</b>  | <b>847</b>                | <b>17</b>  |
| <b>952</b>                | <b>4</b>   | <b>952</b>                | <b>4</b>   | <b>950</b>               | <b>6</b>   | <b>951</b>                | <b>12</b>  | <b>949</b>                | <b>60</b>  |
| <b>970</b>                | <b>7</b>   | <b>969</b>                | <b>17</b>  | <b>965</b>               | <b>43</b>  | <b>960</b>                | <b>62</b>  | <b>953</b>                | <b>34</b>  |
| <b>981</b>                | <b>2</b>   | <b>977</b>                | <b>4</b>   | <b>973</b>               | <b>3</b>   | <b>972</b>                | <b>2</b>   | <b>970</b>                | <b>4</b>   |
| <b>993</b>                | <b>17</b>  | <b>1001</b>               | <b>45</b>  | <b>996</b>               | <b>85</b>  | <b>990</b>                | <b>62</b>  | <b>986</b>                | <b>35</b>  |
| <b>1030</b>               | <b>127</b> | <b>1015</b>               | <b>79</b>  | <b>1011</b>              | <b>9</b>   | <b>1010</b>               | <b>7</b>   | <b>1009</b>               | <b>8</b>   |
| <b>1072</b>               | <b>6</b>   | <b>1082</b>               | <b>13</b>  | <b>1088</b>              | <b>21</b>  | <b>1090</b>               | <b>28</b>  | <b>1092</b>               | <b>35</b>  |
| <b>1153</b>               | <b>3</b>   | <b>1155</b>               | <b>20</b>  | <b>1152</b>              | <b>206</b> | <b>1148</b>               | <b>225</b> | <b>1145</b>               | <b>235</b> |
| <b>1163</b>               | <b>127</b> | <b>1159</b>               | <b>176</b> | <b>1159</b>              | <b>16</b>  | <b>1158</b>               | <b>9</b>   | <b>1158</b>               | <b>5</b>   |
| <b>1183</b>               | <b>65</b>  | <b>1186</b>               | <b>26</b>  | <b>1189</b>              | <b>13</b>  | <b>1189</b>               | <b>10</b>  | <b>1188</b>               | <b>8</b>   |
| <b>1244</b>               | <b>3</b>   | <b>1249</b>               | <b>4</b>   | <b>1252</b>              | <b>5</b>   | <b>1252</b>               | <b>6</b>   | <b>1251</b>               | <b>7</b>   |
| <b>1284</b>               | <b>27</b>  | <b>1284</b>               | <b>36</b>  | <b>1282</b>              | <b>39</b>  | <b>1280</b>               | <b>39</b>  | <b>1279</b>               | <b>39</b>  |
| <b>1314</b>               | <b>29</b>  | <b>1310</b>               | <b>20</b>  | <b>1307</b>              | <b>14</b>  | <b>1304</b>               | <b>11</b>  | <b>1303</b>               | <b>9</b>   |
| <b>1320</b>               | <b>4</b>   | <b>1324</b>               | <b>6</b>   | <b>1326</b>              | <b>5</b>   | <b>1327</b>               | <b>4</b>   | <b>1327</b>               | <b>4</b>   |
| <b>1340</b>               | <b>1</b>   | <b>1340</b>               | <b>1</b>   | <b>1339</b>              | <b>1</b>   | <b>1339</b>               | <b>2</b>   | <b>1338</b>               | <b>2</b>   |
| <b>1353</b>               | <b>5</b>   | <b>1357</b>               | <b>5</b>   | <b>1359</b>              | <b>4</b>   | <b>1360</b>               | <b>4</b>   | <b>1361</b>               | <b>4</b>   |
| <b>1411</b>               | <b>46</b>  | <b>1402</b>               | <b>34</b>  | <b>1397</b>              | <b>28</b>  | <b>1394</b>               | <b>23</b>  | <b>1392</b>               | <b>21</b>  |
| <b>1430</b>               | <b>13</b>  | <b>1431</b>               | <b>13</b>  | <b>1430</b>              | <b>13</b>  | <b>1431</b>               | <b>13</b>  | <b>1431</b>               | <b>13</b>  |
| <b>1440</b>               | <b>14</b>  | <b>1441</b>               | <b>15</b>  | <b>1442</b>              | <b>13</b>  | <b>1443</b>               | <b>18</b>  | <b>1443</b>               | <b>15</b>  |
| <b>1447</b>               | <b>20</b>  | <b>1444</b>               | <b>15</b>  | <b>1442</b>              | <b>15</b>  | <b>1443</b>               | <b>10</b>  | <b>1443</b>               | <b>11</b>  |
| <b>1452</b>               | <b>10</b>  | <b>1451</b>               | <b>8</b>   | <b>1451</b>              | <b>6</b>   | <b>1448</b>               | <b>4</b>   | <b>1448</b>               | <b>4</b>   |



|             |            |             |            |             |            |             |            |             |            |
|-------------|------------|-------------|------------|-------------|------------|-------------|------------|-------------|------------|
| <b>1624</b> | <b>73</b>  | <b>1623</b> | <b>65</b>  | <b>1626</b> | <b>64</b>  | <b>1624</b> | <b>62</b>  | <b>1624</b> | <b>61</b>  |
| <b>1705</b> | <b>319</b> | <b>1721</b> | <b>318</b> | <b>1728</b> | <b>342</b> | <b>1736</b> | <b>339</b> | <b>1739</b> | <b>350</b> |
| 2969        | 2          | 2963        | 3          | 2951        | 8          | 2942        | 11         | 2936        | 13         |
| 2974        | 14         | 2971        | 12         | 2968        | 11         | 2967        | 11         | 2968        | 12         |
| 2978        | 5          | 2973        | 13         | 2971        | 17         | 2970        | 20         | 2970        | 19         |
| 2984        | 5          | 2976        | 5          | 2973        | 8          | 2972        | 8          | 2972        | 10         |
| 3012        | 3          | 3010        | 3          | 3010        | 4          | 3010        | 5          | 3011        | 6          |
| 3026        | 4          | 3022        | 5          | 3019        | 7          | 3019        | 8          | 3020        | 9          |
| 3067        | 2          | 3063        | 2          | 3057        | 3          | 3055        | 4          | 3053        | 4          |
| 3071        | 1          | 3068        | 1          | 3064        | 2          | 3062        | 3          | 3060        | 3          |
| 3392        | 18         | 3395        | 10         | 3396        | 6          | 3399        | 4          | 3402        | 3          |
| 3456        | 20         | 3458        | 15         | 3461        | 11         | 3466        | 9          | 3470        | 8          |
| 3627        | 152        | 3637        | 138        | 3644        | 128        | 3649        | 120        | 3653        | 115        |

<sup>a</sup> Bold indicates the region of the IR spectrum included in the present experimental study.

**Table S5.** Vibrational frequencies ( $\text{cm}^{-1}$ ) scaled by 0.975 and IR intensities ( $\text{kM/mole}$ ) for the  $[\text{N},\text{CO},\text{S}]$  tgccg conformer of  $\text{M}^+(\text{Met})$  calculated at B3LYP/6-311+G(d,p) ( $\text{M}^+ = \text{Li}^+, \text{Na}^+, \text{and K}^+$ ) and B3LYP/HW\*/6-311+G(d,p) ( $\text{M}^+ = \text{Rb}^+ \text{ and } \text{Cs}^+$ ) levels of theory<sup>a</sup>

| $\text{Li}^+(\text{Met})$ | $\text{Na}^+(\text{Met})$ | $\text{K}^+(\text{Met})$ | $\text{Rb}^+(\text{Met})$ | $\text{Cs}^+(\text{Met})$ |            |            |            |            |           |
|---------------------------|---------------------------|--------------------------|---------------------------|---------------------------|------------|------------|------------|------------|-----------|
| 56                        | 1                         | 50                       | 2                         | 47                        | 1          | 30         | 2          | 19         | 2         |
| 87                        | 0.4                       | 73                       | 0.1                       | 58                        | 0.1        | 49         | 0.4        | 36         | 2         |
| 112                       | 1                         | 89                       | 3                         | 75                        | 2          | 61         | 2          | 44         | 1         |
| 144                       | 1                         | 119                      | 5                         | 90                        | 6          | 66         | 2          | 58         | 0.2       |
| 146                       | 2                         | 128                      | 3                         | 117                       | 7          | 94         | 6          | 84         | 6         |
| 164                       | 2                         | 160                      | 2                         | 134                       | 2          | 116        | 7          | 102        | 6         |
| 232                       | 2                         | 179                      | 14                        | 147                       | 4          | 130        | 7          | 118        | 4         |
| 300                       | 7                         | 202                      | 13                        | 160                       | 8          | 135        | 3          | 136        | 2         |
| 306                       | 4                         | 215                      | 23                        | 165                       | 21         | 159        | 1          | 157        | 5         |
| 320                       | 17                        | 240                      | 5                         | 235                       | 1          | 237        | 10         | 235        | 37        |
| 348                       | 39                        | 303                      | 1                         | 285                       | 24         | 272        | 27         | 261        | 5         |
| 384                       | 37                        | 314                      | 3                         | 296                       | 3          | 290        | 2          | 281        | 5         |
| 419                       | 18                        | 337                      | 16                        | 320                       | 13         | 319        | 11         | 314        | 15        |
| 461                       | 60                        | 403                      | 40                        | 363                       | 16         | 355        | 6          | 351        | 2         |
| 503                       | 47                        | 461                      | 7                         | 455                       | 4          | 451        | 3          | 443        | 5         |
| 523                       | 32                        | 504                      | 10                        | 501                       | 11         | 502        | 11         | 509        | 14        |
| <b>599</b>                | <b>13</b>                 | 594                      | 16                        | <b>593</b>                | <b>38</b>  | <b>594</b> | <b>48</b>  | <b>599</b> | <b>59</b> |
| <b>628</b>                | <b>78</b>                 | 616                      | 62                        | <b>612</b>                | <b>39</b>  | <b>614</b> | <b>30</b>  | <b>614</b> | <b>20</b> |
| <b>679</b>                | <b>78</b>                 | 663                      | 68                        | <b>655</b>                | <b>65</b>  | <b>652</b> | <b>61</b>  | <b>653</b> | <b>53</b> |
| <b>682</b>                | <b>11</b>                 | 681                      | 10                        | <b>686</b>                | <b>12</b>  | <b>685</b> | <b>13</b>  | <b>684</b> | <b>14</b> |
| <b>736</b>                | <b>64</b>                 | 728                      | 55                        | <b>724</b>                | <b>48</b>  | <b>721</b> | <b>45</b>  | <b>722</b> | <b>42</b> |
| <b>806</b>                | <b>8</b>                  | 803                      | 10                        | <b>805</b>                | <b>11</b>  | <b>805</b> | <b>12</b>  | <b>797</b> | <b>14</b> |
| <b>827</b>                | <b>9</b>                  | 823                      | 10                        | <b>822</b>                | <b>9</b>   | <b>822</b> | <b>9</b>   | <b>826</b> | <b>11</b> |
| <b>862</b>                | <b>7</b>                  | 853                      | 7                         | <b>847</b>                | <b>12</b>  | <b>843</b> | <b>20</b>  | <b>837</b> | <b>26</b> |
| <b>934</b>                | <b>0.3</b>                | <b>933</b>               | <b>0.2</b>                | <b>933</b>                | <b>1</b>   | <b>933</b> | <b>10</b>  | <b>918</b> | <b>85</b> |
| <b>953</b>                | <b>3</b>                  | <b>955</b>               | <b>3</b>                  | <b>952</b>                | <b>3</b>   | <b>952</b> | <b>3</b>   | <b>951</b> | <b>18</b> |
| <b>990</b>                | <b>17</b>                 | <b>993</b>               | <b>44</b>                 | <b>981</b>                | <b>112</b> | <b>963</b> | <b>115</b> | <b>954</b> | <b>11</b> |

|             |            |             |            |             |            |             |            |             |            |
|-------------|------------|-------------|------------|-------------|------------|-------------|------------|-------------|------------|
| <b>1002</b> | <b>7</b>   | <b>1004</b> | <b>4</b>   | <b>1008</b> | <b>24</b>  | <b>1005</b> | <b>4</b>   | <b>1004</b> | <b>3</b>   |
| <b>1033</b> | <b>131</b> | <b>1019</b> | <b>101</b> | <b>1009</b> | <b>5</b>   | <b>1010</b> | <b>3</b>   | <b>1009</b> | <b>1</b>   |
| <b>1074</b> | <b>8</b>   | <b>1081</b> | <b>15</b>  | <b>1087</b> | <b>26</b>  | <b>1090</b> | <b>38</b>  | <b>1093</b> | <b>51</b>  |
| <b>1163</b> | <b>120</b> | <b>1158</b> | <b>186</b> | <b>1152</b> | <b>211</b> | <b>1147</b> | <b>224</b> | <b>1146</b> | <b>251</b> |
| <b>1175</b> | <b>23</b>  | <b>1176</b> | <b>7</b>   | <b>1176</b> | <b>7</b>   | <b>1173</b> | <b>7</b>   | <b>1159</b> | <b>7</b>   |
| <b>1186</b> | <b>51</b>  | <b>1193</b> | <b>24</b>  | <b>1194</b> | <b>13</b>  | <b>1191</b> | <b>9</b>   | <b>1187</b> | <b>3</b>   |
| <b>1247</b> | <b>4</b>   | <b>1253</b> | <b>5</b>   | <b>1255</b> | <b>5</b>   | <b>1255</b> | <b>6</b>   | <b>1252</b> | <b>9</b>   |
| <b>1287</b> | <b>22</b>  | <b>1285</b> | <b>27</b>  | <b>1281</b> | <b>30</b>  | <b>1278</b> | <b>32</b>  | <b>1270</b> | <b>28</b>  |
| <b>1318</b> | <b>25</b>  | <b>1312</b> | <b>20</b>  | <b>1308</b> | <b>12</b>  | <b>1307</b> | <b>9</b>   | <b>1305</b> | <b>4</b>   |
| <b>1324</b> | <b>5</b>   | <b>1328</b> | <b>6</b>   | <b>1329</b> | <b>6</b>   | <b>1328</b> | <b>7</b>   | <b>1326</b> | <b>11</b>  |
| <b>1338</b> | <b>1</b>   | <b>1340</b> | <b>2</b>   | <b>1340</b> | <b>4</b>   | <b>1339</b> | <b>4</b>   | <b>1336</b> | <b>4</b>   |
| <b>1355</b> | <b>7</b>   | <b>1355</b> | <b>6</b>   | <b>1358</b> | <b>4</b>   | <b>1358</b> | <b>3</b>   | <b>1358</b> | <b>1</b>   |
| <b>1413</b> | <b>46</b>  | <b>1402</b> | <b>30</b>  | <b>1396</b> | <b>25</b>  | <b>1392</b> | <b>20</b>  | <b>1387</b> | <b>17</b>  |
| <b>1431</b> | <b>7</b>   | <b>1428</b> | <b>6</b>   | <b>1428</b> | <b>5</b>   | <b>1429</b> | <b>4</b>   | <b>1431</b> | <b>16</b>  |
| <b>1438</b> | <b>17</b>  | <b>1434</b> | <b>20</b>  | <b>1433</b> | <b>18</b>  | <b>1433</b> | <b>19</b>  | <b>1432</b> | <b>6</b>   |
| <b>1439</b> | <b>13</b>  | <b>1441</b> | <b>9</b>   | <b>1442</b> | <b>9</b>   | <b>1443</b> | <b>11</b>  | <b>1440</b> | <b>13</b>  |
| <b>1454</b> | <b>19</b>  | <b>1445</b> | <b>16</b>  | <b>1445</b> | <b>15</b>  | <b>1445</b> | <b>12</b>  | <b>1443</b> | <b>10</b>  |
| <b>1621</b> | <b>69</b>  | <b>1624</b> | <b>62</b>  | <b>1621</b> | <b>58</b>  | <b>1622</b> | <b>54</b>  | <b>1617</b> | <b>50</b>  |
| <b>1708</b> | <b>319</b> | <b>1724</b> | <b>317</b> | <b>1730</b> | <b>343</b> | <b>1737</b> | <b>340</b> | <b>1738</b> | <b>349</b> |
| 2966        | 4          | 2960        | 6          | 2951        | 8          | 2948        | 9          | 2961        | 4          |
| 2976        | 11         | 2970        | 5          | 2964        | 7          | 2966        | 7          | 2971        | 13         |
| 2982        | 6          | 2975        | 14         | 2972        | 16         | 2971        | 18         | 2973        | 16         |
| 2985        | 2          | 2981        | 4          | 2978        | 6          | 2978        | 6          | 2982        | 5          |
| 3005        | 5          | 3003        | 7          | 3000        | 8          | 3001        | 10         | 3003        | 11         |
| 3029        | 3          | 3024        | 4          | 3021        | 6          | 3021        | 7          | 3027        | 6          |
| 3061        | 6          | 3059        | 6          | 3054        | 7          | 3053        | 6          | 3058        | 4          |
| 3068        | 0.4        | 3064        | 1          | 3063        | 1          | 3062        | 2          | 3064        | 2          |
| 3392        | 14         | 3394        | 8          | 3399        | 4          | 3406        | 3          | 3414        | 8          |
| 3461        | 15         | 3461        | 11         | 3469        | 8          | 3478        | 7          | 3489        | 27         |
| 3625        | 159        | 3635        | 142        | 3643        | 131        | 3648        | 122        | 3650        | 112        |

<sup>a</sup> Bold indicates the region of the IR spectrum included in the present experimental study.

**Table S6.** Vibrational frequencies ( $\text{cm}^{-1}$ ) scaled by 0.975 and IR intensities ( $\text{km}/\text{mole}$ ) for the  $[\text{N}_2\text{CO}_2\text{S}]$  tgggt conformer of  $\text{M}^+(\text{Met})$  calculated at B3LYP/6-311+G(d,p) ( $\text{M}^+ = \text{Li}^+, \text{Na}^+, \text{and K}^+$ ) and B3LYP/HW\*/6-311+G(d,p) ( $\text{M}^+ = \text{Rb}^+ \text{ and } \text{Cs}^+$ ) levels of theory<sup>a</sup>

| $\text{Li}^+(\text{Met})$ |     | $\text{Na}^+(\text{Met})$ |     | $\text{K}^+(\text{Met})$ |      | $\text{Rb}^+(\text{Met})$ |     | $\text{Cs}^+(\text{Met})$ |     |
|---------------------------|-----|---------------------------|-----|--------------------------|------|---------------------------|-----|---------------------------|-----|
| 51                        | 0.2 | 46                        | 0.1 | 45                       | 0.01 | 41                        | 0.1 | 31                        | 0.4 |
| 91                        | 1   | 79                        | 1   | 67                       | 2    | 57                        | 2   | 50                        | 1   |
| 124                       | 2   | 97                        | 3   | 73                       | 3    | 69                        | 2   | 67                        | 6   |
| 136                       | 1   | 115                       | 4   | 98                       | 3    | 80                        | 8   | 68                        | 1   |
| 163                       | 3   | 153                       | 14  | 105                      | 14   | 88                        | 4   | 76                        | 5   |
| 165                       | 1   | 154                       | 4   | 127                      | 9    | 105                       | 3   | 92                        | 1   |
| 236                       | 3   | 180                       | 5   | 157                      | 1    | 136                       | 6   | 118                       | 4   |
| 249                       | 0.5 | 183                       | 12  | 172                      | 14   | 155                       | 0.4 | 154                       | 0.4 |
| 287                       | 15  | 224                       | 19  | 186                      | 6    | 188                       | 2   | 187                       | 2   |
| 311                       | 2   | 234                       | 6   | 215                      | 1    | 210                       | 1   | 209                       | 1   |
| 336                       | 52  | 258                       | 2   | 254                      | 5    | 253                       | 9   | 248                       | 14  |

Supplementary Material (ESI) for *PCCP*  
 This journal is © the Owner Societies 2010

|             |            |             |            |             |            |             |            |             |            |
|-------------|------------|-------------|------------|-------------|------------|-------------|------------|-------------|------------|
| 370         | 39         | 321         | 5          | 296         | 15         | 290         | 12         | 287         | 10         |
| 405         | 18         | 323         | 16         | 325         | 8          | 326         | 8          | 324         | 8          |
| 458         | 73         | 407         | 29         | 383         | 18         | 376         | 13         | 371         | 8          |
| 504         | 45         | 470         | 13         | 462         | 10         | 462         | 9          | 462         | 9          |
| 558         | 25         | 542         | 15         | 531         | 15         | 527         | 15         | 523         | 16         |
| <b>608</b>  | <b>72</b>  | 588         | 56         | <b>573</b>  | <b>51</b>  | <b>566</b>  | <b>51</b>  | <b>561</b>  | <b>49</b>  |
| <b>642</b>  | <b>18</b>  | 640         | 10         | <b>634</b>  | <b>70</b>  | <b>627</b>  | <b>70</b>  | <b>622</b>  | <b>69</b>  |
| <b>665</b>  | <b>60</b>  | 647         | 65         | <b>639</b>  | <b>4</b>   | <b>637</b>  | <b>2</b>   | <b>636</b>  | <b>1</b>   |
| <b>683</b>  | <b>9</b>   | 683         | 7          | <b>685</b>  | <b>8</b>   | <b>685</b>  | <b>9</b>   | <b>686</b>  | <b>9</b>   |
| <b>723</b>  | <b>76</b>  | 716         | 62         | <b>711</b>  | <b>60</b>  | <b>709</b>  | <b>57</b>  | <b>707</b>  | <b>56</b>  |
| <b>784</b>  | <b>18</b>  | 779         | 18         | <b>779</b>  | <b>19</b>  | <b>778</b>  | <b>20</b>  | <b>778</b>  | <b>20</b>  |
| <b>846</b>  | <b>9</b>   | 847         | 10         | <b>845</b>  | <b>13</b>  | <b>845</b>  | <b>16</b>  | <b>843</b>  | <b>21</b>  |
| <b>893</b>  | <b>10</b>  | 895         | 15         | <b>892</b>  | <b>21</b>  | <b>890</b>  | <b>27</b>  | <b>889</b>  | <b>31</b>  |
| <b>942</b>  | <b>3</b>   | <b>939</b>  | <b>4</b>   | <b>939</b>  | <b>4</b>   | <b>938</b>  | <b>4</b>   | <b>937</b>  | <b>4</b>   |
| <b>965</b>  | <b>4</b>   | <b>962</b>  | <b>5</b>   | <b>959</b>  | <b>5</b>   | <b>957</b>  | <b>4</b>   | <b>955</b>  | <b>4</b>   |
| <b>971</b>  | <b>2</b>   | <b>971</b>  | <b>5</b>   | <b>970</b>  | <b>15</b>  | <b>967</b>  | <b>28</b>  | <b>963</b>  | <b>44</b>  |
| <b>1021</b> | <b>74</b>  | <b>1012</b> | <b>106</b> | <b>999</b>  | <b>91</b>  | <b>992</b>  | <b>70</b>  | <b>987</b>  | <b>45</b>  |
| <b>1033</b> | <b>53</b>  | <b>1031</b> | <b>6</b>   | <b>1030</b> | <b>2</b>   | <b>1030</b> | <b>3</b>   | <b>1029</b> | <b>5</b>   |
| <b>1063</b> | <b>12</b>  | <b>1072</b> | <b>16</b>  | <b>1074</b> | <b>20</b>  | <b>1077</b> | <b>25</b>  | <b>1078</b> | <b>28</b>  |
| <b>1148</b> | <b>30</b>  | <b>1147</b> | <b>73</b>  | <b>1143</b> | <b>105</b> | <b>1143</b> | <b>138</b> | <b>1142</b> | <b>156</b> |
| <b>1173</b> | <b>160</b> | <b>1169</b> | <b>134</b> | <b>1166</b> | <b>108</b> | <b>1165</b> | <b>80</b>  | <b>1165</b> | <b>63</b>  |
| 1211        | 9          | 1220        | 10         | 1219        | 4          | 1221        | 4          | 1222        | 3          |
| 1222        | 2          | 1223        | 1          | 1224        | 7          | 1227        | 6          | 1228        | 6          |
| 1294        | 23         | 1294        | 28         | 1294        | 31         | 1292        | 31         | 1292        | 31         |
| 1310        | 20         | 1308        | 24         | 1305        | 21         | 1304        | 21         | 1305        | 20         |
| 1320        | 13         | 1323        | 7          | 1324        | 6          | 1324        | 5          | 1324        | 5          |
| 1339        | 0.2        | 1339        | 0.3        | 1337        | 1          | 1336        | 1          | 1336        | 1          |
| 1360        | 3          | 1364        | 3          | 1365        | 4          | 1366        | 4          | 1366        | 4          |
| 1412        | 60         | 1401        | 37         | 1397        | 28         | 1395        | 23         | 1395        | 21         |
| 1430        | 13         | 1430        | 12         | 1431        | 12         | 1430        | 12         | 1430        | 12         |
| 1440        | 16         | 1441        | 16         | 1441        | 18         | 1442        | 17         | 1441        | 16         |
| 1453        | 7          | 1451        | 6          | 1446        | 3          | 1445        | 2          | 1445        | 4          |
| 1456        | 7          | 1452        | 9          | 1449        | 9          | 1447        | 11         | 1448        | 10         |
| 1621        | 74         | 1621        | 69         | 1620        | 70         | 1619        | 67         | 1617        | 67         |
| 1712        | 327        | 1725        | 318        | 1728        | 341        | 1734        | 336        | 1736        | 345        |
| 2970        | 1          | 2949        | 7          | 2931        | 11         | 2921        | 13         | 2913        | 15         |
| 2975        | 20         | 2971        | 8          | 2965        | 8          | 2961        | 11         | 2959        | 13         |
| 2978        | 2          | 2975        | 12         | 2972        | 18         | 2971        | 18         | 2970        | 19         |
| 2982        | 8          | 2979        | 15         | 2976        | 18         | 2980        | 19         | 2982        | 19         |
| 3017        | 1          | 3017        | 1          | 3016        | 2          | 3018        | 1          | 3020        | 1          |
| 3028        | 5          | 3029        | 6          | 3030        | 7          | 3031        | 9          | 3033        | 10         |
| 3066        | 2          | 3062        | 2          | 3057        | 3          | 3056        | 4          | 3054        | 4          |
| 3072        | 1          | 3069        | 1          | 3065        | 2          | 3064        | 2          | 3062        | 3          |
| 3396        | 17         | 3397        | 11         | 3396        | 7          | 3398        | 5          | 3399        | 4          |
| 3460        | 18         | 3459        | 13         | 3460        | 9          | 3463        | 7          | 3465        | 6          |
| 3630        | 160        | 3641        | 143        | 3649        | 131        | 3655        | 121        | 3658        | 115        |

<sup>a</sup> Bold indicates the region of the IR spectrum included in the present experimental study.

**Table S7.** Vibrational frequencies ( $\text{cm}^{-1}$ ) scaled by 0.975 and IR intensities (kM/mole) for the [N,CO,S] tgggg conformer of  $M^+(\text{Met})$  calculated at B3LYP/6-311+G(d,p) ( $M^+ = \text{Li}^+, \text{Na}^+, \text{and K}^+$ ) and B3LYP/HW\*/6-311+G(d,p) ( $M^+ = \text{Rb}^+ \text{ and } \text{Cs}^+$ ) levels of theory<sup>a</sup>

| $\text{Li}^+(\text{Met})$ |           | $\text{Na}^+(\text{Met})$ |            | $\text{K}^+(\text{Met})$ |            | $\text{Rb}^+(\text{Met})$ |            | $\text{Cs}^+(\text{Met})$ |            |
|---------------------------|-----------|---------------------------|------------|--------------------------|------------|---------------------------|------------|---------------------------|------------|
| 46                        | 1         | 43                        | 1          | 57                       | 2          | 56                        | 3          | 42                        | 3          |
| 84                        | 2         | 72                        | 2          | 74                       | 1          | 62                        | 4          | 53                        | 4          |
| 119                       | 2         | 97                        | 5          | 78                       | 5          | 67                        | 2          | 66                        | 1          |
| 138                       | 0.1       | 116                       | 7          | 94                       | 14         | 81                        | 5          | 82                        | 2          |
| 146                       | 2         | 140                       | 7          | 108                      | 4          | 92                        | 3          | 82                        | 3          |
| 182                       | 1         | 145                       | 2          | 125                      | 8          | 106                       | 3          | 106                       | 4          |
| 233                       | 1         | 170                       | 9          | 154                      | 0.2        | 147                       | 5          | 131                       | 3          |
| 278                       | 8         | 200                       | 14         | 170                      | 3          | 158                       | 0.1        | 155                       | 0.03       |
| 302                       | 8         | 223                       | 23         | 184                      | 16         | 169                       | 1          | 167                       | 1          |
| 311                       | 1         | 247                       | 0.2        | 243                      | 2          | 238                       | 4          | 232                       | 5          |
| 334                       | 61        | 285                       | 1          | 286                      | 1          | 289                       | 12         | 283                       | 24         |
| 366                       | 29        | 319                       | 7          | 301                      | 21         | 292                       | 12         | 289                       | 1          |
| 400                       | 15        | 323                       | 15         | 330                      | 4          | 334                       | 4          | 331                       | 5          |
| 463                       | 72        | 404                       | 34         | 391                      | 18         | 383                       | 13         | 377                       | 10         |
| 505                       | 52        | 470                       | 12         | 476                      | 12         | 475                       | 11         | 474                       | 11         |
| 569                       | 18        | 552                       | 12         | 531                      | 12         | 522                       | 15         | 520                       | 15         |
| <b>597</b>                | <b>11</b> | <b>580</b>                | <b>36</b>  | <b>562</b>               | <b>23</b>  | <b>558</b>                | <b>21</b>  | <b>556</b>                | <b>20</b>  |
| <b>620</b>                | <b>74</b> | <b>611</b>                | <b>18</b>  | <b>615</b>               | <b>8</b>   | <b>616</b>                | <b>9</b>   | <b>615</b>                | <b>10</b>  |
| <b>665</b>                | <b>59</b> | <b>648</b>                | <b>70</b>  | <b>641</b>               | <b>84</b>  | <b>633</b>                | <b>83</b>  | <b>630</b>                | <b>79</b>  |
| <b>683</b>                | <b>7</b>  | <b>685</b>                | <b>6</b>   | <b>687</b>               | <b>5</b>   | <b>689</b>                | <b>6</b>   | <b>688</b>                | <b>5</b>   |
| <b>719</b>                | <b>75</b> | <b>706</b>                | <b>63</b>  | <b>701</b>               | <b>67</b>  | <b>699</b>                | <b>61</b>  | <b>698</b>                | <b>62</b>  |
| <b>780</b>                | <b>20</b> | <b>777</b>                | <b>20</b>  | <b>780</b>               | <b>26</b>  | <b>782</b>                | <b>28</b>  | <b>781</b>                | <b>29</b>  |
| <b>833</b>                | <b>13</b> | <b>832</b>                | <b>17</b>  | <b>832</b>               | <b>23</b>  | <b>831</b>                | <b>26</b>  | <b>830</b>                | <b>30</b>  |
| <b>878</b>                | <b>6</b>  | <b>882</b>                | <b>9</b>   | <b>887</b>               | <b>14</b>  | <b>888</b>                | <b>17</b>  | <b>888</b>                | <b>19</b>  |
| <b>933</b>                | <b>4</b>  | <b>930</b>                | <b>6</b>   | <b>929</b>               | <b>9</b>   | <b>927</b>                | <b>10</b>  | <b>924</b>                | <b>12</b>  |
| <b>956</b>                | <b>2</b>  | <b>958</b>                | <b>3</b>   | <b>955</b>               | <b>3</b>   | <b>955</b>                | <b>5</b>   | <b>958</b>                | <b>13</b>  |
| <b>974</b>                | <b>17</b> | <b>973</b>                | <b>27</b>  | <b>971</b>               | <b>41</b>  | <b>970</b>                | <b>53</b>  | <b>966</b>                | <b>56</b>  |
| <b>1025</b>               | <b>83</b> | <b>1012</b>               | <b>93</b>  | <b>1001</b>              | <b>57</b>  | <b>995</b>                | <b>35</b>  | <b>988</b>                | <b>19</b>  |
| <b>1028</b>               | <b>39</b> | <b>1032</b>               | <b>1</b>   | <b>1032</b>              | <b>1</b>   | <b>1032</b>               | <b>2</b>   | <b>1032</b>               | <b>3</b>   |
| <b>1069</b>               | <b>16</b> | <b>1080</b>               | <b>27</b>  | <b>1082</b>              | <b>35</b>  | <b>1083</b>               | <b>42</b>  | <b>1082</b>               | <b>45</b>  |
| <b>1164</b>               | <b>90</b> | <b>1155</b>               | <b>149</b> | <b>1149</b>              | <b>150</b> | <b>1146</b>               | <b>165</b> | <b>1144</b>               | <b>172</b> |
| <b>1174</b>               | <b>94</b> | <b>1170</b>               | <b>45</b>  | <b>1166</b>              | <b>41</b>  | <b>1165</b>               | <b>26</b>  | <b>1166</b>               | <b>20</b>  |
| <b>1210</b>               | <b>7</b>  | <b>1219</b>               | <b>4</b>   | <b>1216</b>              | <b>1</b>   | <b>1216</b>               | <b>0.5</b> | <b>1216</b>               | <b>0.3</b> |
| <b>1226</b>               | <b>2</b>  | <b>1231</b>               | <b>2</b>   | <b>1232</b>              | <b>4</b>   | <b>1234</b>               | <b>4</b>   | <b>1235</b>               | <b>5</b>   |
| <b>1294</b>               | <b>21</b> | <b>1293</b>               | <b>26</b>  | <b>1293</b>              | <b>27</b>  | <b>1292</b>               | <b>27</b>  | <b>1291</b>               | <b>25</b>  |
| <b>1309</b>               | <b>15</b> | <b>1309</b>               | <b>14</b>  | <b>1306</b>              | <b>12</b>  | <b>1306</b>               | <b>12</b>  | <b>1306</b>               | <b>12</b>  |
| <b>1320</b>               | <b>7</b>  | <b>1322</b>               | <b>3</b>   | <b>1324</b>              | <b>2</b>   | <b>1325</b>               | <b>2</b>   | <b>1324</b>               | <b>2</b>   |
| <b>1338</b>               | <b>3</b>  | <b>1338</b>               | <b>3</b>   | <b>1335</b>              | <b>2</b>   | <b>1336</b>               | <b>1</b>   | <b>1336</b>               | <b>1</b>   |
| <b>1359</b>               | <b>5</b>  | <b>1362</b>               | <b>5</b>   | <b>1363</b>              | <b>3</b>   | <b>1364</b>               | <b>3</b>   | <b>1365</b>               | <b>3</b>   |
| <b>1410</b>               | <b>53</b> | <b>1395</b>               | <b>28</b>  | <b>1388</b>              | <b>23</b>  | <b>1387</b>               | <b>19</b>  | <b>1388</b>               | <b>18</b>  |
| <b>1430</b>               | <b>2</b>  | <b>1429</b>               | <b>2</b>   | <b>1427</b>              | <b>3</b>   | <b>1426</b>               | <b>4</b>   | <b>1425</b>               | <b>4</b>   |
| <b>1436</b>               | <b>21</b> | <b>1435</b>               | <b>19</b>  | <b>1433</b>              | <b>18</b>  | <b>1435</b>               | <b>15</b>  | <b>1433</b>               | <b>16</b>  |
| <b>1438</b>               | <b>11</b> | <b>1442</b>               | <b>12</b>  | <b>1447</b>              | <b>14</b>  | <b>1446</b>               | <b>14</b>  | <b>1447</b>               | <b>15</b>  |
| <b>1459</b>               | <b>6</b>  | <b>1458</b>               | <b>7</b>   | <b>1456</b>              | <b>8</b>   | <b>1455</b>               | <b>8</b>   | <b>1453</b>               | <b>7</b>   |

|             |            |             |            |             |            |             |            |             |            |
|-------------|------------|-------------|------------|-------------|------------|-------------|------------|-------------|------------|
| <b>1625</b> | <b>78</b>  | <b>1622</b> | <b>73</b>  | <b>1618</b> | <b>79</b>  | <b>1617</b> | <b>76</b>  | <b>1614</b> | <b>76</b>  |
| <b>1711</b> | <b>315</b> | <b>1725</b> | <b>306</b> | <b>1724</b> | <b>333</b> | <b>1731</b> | <b>336</b> | <b>1732</b> | <b>344</b> |
| 2969        | 2          | 2942        | 7          | 2913        | 11         | 2903        | 14         | 2896        | 16         |
| 2978        | 5          | 2967        | 6          | 2959        | 11         | 2956        | 13         | 2954        | 15         |
| 2981        | 10         | 2978        | 9          | 2976        | 10         | 2974        | 12         | 2974        | 13         |
| 2988        | 6          | 2986        | 10         | 2986        | 12         | 2986        | 14         | 2985        | 15         |
| 3013        | 2          | 3015        | 1          | 3018        | 0.5        | 3019        | 1          | 3020        | 1          |
| 3030        | 4          | 3029        | 6          | 3033        | 7          | 3034        | 8          | 3035        | 9          |
| 3066        | 5          | 3064        | 4          | 3062        | 3          | 3059        | 3          | 3059        | 3          |
| 3069        | 1          | 3068        | 1          | 3067        | 2          | 3065        | 2          | 3064        | 2          |
| 3397        | 18         | 3398        | 12         | 3398        | 8          | 3400        | 5          | 3401        | 4          |
| 3463        | 19         | 3462        | 14         | 3463        | 10         | 3465        | 8          | 3468        | 7          |
| 3630        | 150        | 3641        | 134        | 3648        | 122        | 3653        | 113        | 3657        | 107        |

<sup>a</sup> Bold indicates the region of the IR spectrum included in the present experimental study.

**Table S8.** Vibrational frequencies ( $\text{cm}^{-1}$ ) scaled by 0.975 and IR intensities (kM/mole) for the  $[\text{CO}_2^-]$  ctggg conformer of  $\text{M}^+(\text{Met})$  calculated at B3LYP/6-311+G(d,p) ( $\text{M}^+ = \text{Li}^+, \text{Na}^+, \text{and K}^+$ ) and B3LYP/HW\*/6-311+G(d,p) ( $\text{M}^+ = \text{Rb}^+ \text{ and Cs}^+$ ) levels of theory<sup>a</sup>

| $\text{Li}^+(\text{Met})$ | $\text{Na}^+(\text{Met})$ | $\text{K}^+(\text{Met})$ | $\text{Rb}^+(\text{Met})$ | $\text{Cs}^+(\text{Met})$ |
|---------------------------|---------------------------|--------------------------|---------------------------|---------------------------|
| 45                        | 2                         | 36                       | 4                         | 36                        |
| 69                        | 3                         | 58                       | 5                         | 58                        |
| 83                        | 1                         | 79                       | 5                         | 76                        |
| 116                       | 5                         | 91                       | 10                        | 82                        |
| 151                       | 0.4                       | 125                      | 22                        | 106                       |
| 162                       | 68                        | 152                      | 7                         | 130                       |
| 220                       | 37                        | 159                      | 15                        | 143                       |
| 237                       | 31                        | 221                      | 35                        | 185                       |
| 269                       | 13                        | 252                      | 22                        | 226                       |
| 300                       | 18                        | 269                      | 7                         | 262                       |
| 336                       | 29                        | 308                      | 36                        | 305                       |
| 343                       | 26                        | 315                      | 15                        | 311                       |
| 389                       | 5                         | 344                      | 43                        | 342                       |
| 481                       | 98                        | 401                      | 15                        | 406                       |
| 518                       | 1                         | 509                      | 15                        | 510                       |
| 523                       | 84                        | 518                      | 12                        | 514                       |
| <b>595</b>                | <b>75</b>                 | <b>584</b>               | <b>16</b>                 | <b>581</b>                |
| <b>613</b>                | <b>1</b>                  | <b>612</b>               | <b>1</b>                  | <b>613</b>                |
| <b>681</b>                | <b>4</b>                  | <b>681</b>               | <b>3</b>                  | <b>683</b>                |
| <b>770</b>                | <b>16</b>                 | <b>765</b>               | <b>12</b>                 | <b>760</b>                |
| <b>810</b>                | <b>11</b>                 | <b>809</b>               | <b>11</b>                 | <b>809</b>                |
| <b>830</b>                | <b>10</b>                 | <b>830</b>               | <b>9</b>                  | <b>830</b>                |
| <b>878</b>                | <b>23</b>                 | <b>867</b>               | <b>30</b>                 | <b>854</b>                |
| <b>930</b>                | <b>10</b>                 | <b>930</b>               | <b>12</b>                 | <b>931</b>                |
| <b>952</b>                | <b>7</b>                  | <b>950</b>               | <b>8</b>                  | <b>947</b>                |
| <b>958</b>                | <b>3</b>                  | <b>954</b>               | <b>2</b>                  | <b>955</b>                |
| <b>995</b>                | <b>13</b>                 | <b>996</b>               | <b>15</b>                 | <b>996</b>                |

|             |            |             |            |             |            |             |            |             |            |
|-------------|------------|-------------|------------|-------------|------------|-------------|------------|-------------|------------|
| <b>1055</b> | <b>23</b>  | <b>1055</b> | <b>26</b>  | <b>1057</b> | <b>28</b>  | <b>1057</b> | <b>30</b>  | <b>1056</b> | <b>31</b>  |
| <b>1091</b> | <b>22</b>  | <b>1088</b> | <b>18</b>  | <b>1085</b> | <b>15</b>  | <b>1084</b> | <b>15</b>  | <b>1083</b> | <b>15</b>  |
| <b>1123</b> | <b>61</b>  | <b>1125</b> | <b>67</b>  | <b>1124</b> | <b>75</b>  | <b>1123</b> | <b>75</b>  | <b>1124</b> | <b>78</b>  |
| <b>1163</b> | <b>2</b>   | <b>1161</b> | <b>2</b>   | <b>1159</b> | <b>1</b>   | <b>1158</b> | <b>1</b>   | <b>1157</b> | <b>1</b>   |
| <b>1237</b> | <b>46</b>  | <b>1237</b> | <b>50</b>  | <b>1235</b> | <b>54</b>  | <b>1235</b> | <b>55</b>  | <b>1235</b> | <b>57</b>  |
| <b>1280</b> | <b>12</b>  | <b>1277</b> | <b>14</b>  | <b>1273</b> | <b>17</b>  | <b>1271</b> | <b>15</b>  | <b>1269</b> | <b>15</b>  |
| <b>1310</b> | <b>15</b>  | <b>1308</b> | <b>25</b>  | <b>1305</b> | <b>32</b>  | <b>1304</b> | <b>50</b>  | <b>1302</b> | <b>72</b>  |
| <b>1333</b> | <b>27</b>  | <b>1330</b> | <b>44</b>  | <b>1326</b> | <b>74</b>  | <b>1321</b> | <b>89</b>  | <b>1317</b> | <b>85</b>  |
| <b>1339</b> | <b>4</b>   | <b>1337</b> | <b>8</b>   | <b>1337</b> | <b>4</b>   | <b>1336</b> | <b>2</b>   | <b>1334</b> | <b>2</b>   |
| <b>1357</b> | <b>18</b>  | <b>1354</b> | <b>30</b>  | <b>1351</b> | <b>48</b>  | <b>1349</b> | <b>44</b>  | <b>1349</b> | <b>41</b>  |
| <b>1398</b> | <b>136</b> | <b>1378</b> | <b>99</b>  | <b>1369</b> | <b>68</b>  | <b>1366</b> | <b>44</b>  | <b>1364</b> | <b>33</b>  |
| <b>1430</b> | <b>6</b>   | <b>1428</b> | <b>16</b>  | <b>1423</b> | <b>228</b> | <b>1413</b> | <b>278</b> | <b>1407</b> | <b>287</b> |
| <b>1432</b> | <b>54</b>  | <b>1430</b> | <b>86</b>  | <b>1430</b> | <b>23</b>  | <b>1429</b> | <b>7</b>   | <b>1428</b> | <b>7</b>   |
| <b>1437</b> | <b>31</b>  | <b>1435</b> | <b>32</b>  | <b>1433</b> | <b>10</b>  | <b>1432</b> | <b>12</b>  | <b>1432</b> | <b>11</b>  |
| <b>1442</b> | <b>26</b>  | <b>1441</b> | <b>40</b>  | <b>1438</b> | <b>62</b>  | <b>1439</b> | <b>29</b>  | <b>1436</b> | <b>30</b>  |
| <b>1457</b> | <b>207</b> | <b>1444</b> | <b>147</b> | <b>1442</b> | <b>13</b>  | <b>1443</b> | <b>12</b>  | <b>1442</b> | <b>13</b>  |
| <b>1576</b> | <b>43</b>  | <b>1576</b> | <b>19</b>  | <b>1576</b> | <b>12</b>  | <b>1573</b> | <b>10</b>  | <b>1571</b> | <b>8</b>   |
| <b>1620</b> | <b>277</b> | <b>1637</b> | <b>118</b> | <b>1636</b> | <b>12</b>  | <b>1635</b> | <b>15</b>  | <b>1635</b> | <b>15</b>  |
| <b>1634</b> | <b>11</b>  | <b>1639</b> | <b>218</b> | <b>1650</b> | <b>310</b> | <b>1661</b> | <b>324</b> | <b>1667</b> | <b>315</b> |
| 2835        | 962        | 2895        | 869        | 2935        | 805        | 2959        | 407        | 2923        | 351        |
| 2970        | 4          | 2967        | 7          | 2966        | 7          | 2965        | 210        | 2962        | 22         |
| 2974        | 15         | 2974        | 15         | 2974        | 15         | 2969        | 476        | 2972        | 56         |
| 2990        | 4          | 2989        | 5          | 2988        | 5          | 2973        | 48         | 2985        | 677        |
| 3003        | 0.1        | 3006        | 0.5        | 3006        | 7          | 2988        | 6          | 2987        | 27         |
| 3013        | 2          | 3013        | 2          | 3012        | 1          | 3007        | 1          | 3008        | 16         |
| 3037        | 3          | 3036        | 3          | 3026        | 326        | 3011        | 5          | 3011        | 3          |
| 3058        | 5          | 3057        | 6          | 3035        | 7          | 3035        | 5          | 3035        | 5          |
| 3067        | 1          | 3066        | 1          | 3056        | 6          | 3054        | 7          | 3054        | 7          |
| 3169        | 201        | 3102        | 258        | 3065        | 1          | 3065        | 1          | 3064        | 1          |
| 3419        | 83         | 3422        | 77         | 3427        | 75         | 3429        | 71         | 3431        | 69         |

<sup>a</sup> Bold indicates the region of the IR spectrum included in the present experimental study.

**Table S9.** Vibrational frequencies ( $\text{cm}^{-1}$ ) scaled by 0.975 and IR intensities ( $\text{km}/\text{mole}$ ) for the  $[\text{CO}_2^-]$  cgtgg and ctggt conformers of  $\text{M}^+(\text{Met})$  calculated at B3LYP/6-311+G(d,p) ( $\text{M}^+ = \text{K}^+$ ) and B3LYP/HW\*/6-311+G(d,p) ( $\text{M}^+ = \text{Rb}^+$  and  $\text{Cs}^+$ )<sup>a</sup>

| [CO <sub>2</sub> <sup>-</sup> ] cgtgg |    |                       |    |                       |    | [CO <sub>2</sub> <sup>-</sup> ] ctggt |     |                       |     |                       |     |
|---------------------------------------|----|-----------------------|----|-----------------------|----|---------------------------------------|-----|-----------------------|-----|-----------------------|-----|
| K <sup>+</sup> (Met)                  |    | Rb <sup>+</sup> (Met) |    | Cs <sup>+</sup> (Met) |    | K <sup>+</sup> (Met)                  |     | Rb <sup>+</sup> (Met) |     | Cs <sup>+</sup> (Met) |     |
| 36                                    | 1  | 30                    | 2  | 31                    | 2  | 25                                    | 0.4 | 25                    | 0.3 | 23                    | 0.2 |
| 56                                    | 8  | 52                    | 8  | 53                    | 3  | 51                                    | 5   | 51                    | 6   | 49                    | 7   |
| 65                                    | 7  | 61                    | 2  | 59                    | 3  | 62                                    | 14  | 58                    | 7   | 54                    | 4   |
| 86                                    | 4  | 78                    | 7  | 73                    | 9  | 88                                    | 4   | 77                    | 5   | 67                    | 7   |
| 122                                   | 21 | 106                   | 7  | 93                    | 5  | 115                                   | 17  | 109                   | 13  | 97                    | 7   |
| 147                                   | 8  | 124                   | 18 | 118                   | 15 | 141                                   | 10  | 117                   | 7   | 108                   | 9   |
| 155                                   | 14 | 147                   | 3  | 151                   | 4  | 150                                   | 8   | 147                   | 11  | 143                   | 11  |
| 179                                   | 14 | 174                   | 12 | 174                   | 13 | 187                                   | 41  | 171                   | 18  | 167                   | 13  |
| 204                                   | 29 | 199                   | 27 | 196                   | 21 | 196                                   | 7   | 195                   | 15  | 192                   | 17  |
| 230                                   | 12 | 217                   | 1  | 216                   | 1  | 230                                   | 12  | 226                   | 6   | 226                   | 5   |

Supplementary Material (ESI) for *PCCP*  
 This journal is © the Owner Societies 2010

|             |            |             |            |             |            |             |            |             |            |             |            |
|-------------|------------|-------------|------------|-------------|------------|-------------|------------|-------------|------------|-------------|------------|
| 299         | 5          | 298         | 8          | 299         | 8          | 295         | 18         | 293         | 14         | 293         | 13         |
| 323         | 53         | 320         | 58         | 331         | 62         | 309         | 23         | 308         | 25         | 307         | 31         |
| 351         | 11         | 356         | 17         | 356         | 21         | 338         | 39         | 337         | 45         | 336         | 47         |
| 357         | 14         | 357         | 5          | 362         | 2          | 400         | 22         | 404         | 18         | 406         | 15         |
| 435         | 55         | 434         | 50         | 431         | 52         | 511         | 30         | 511         | 29         | 510         | 31         |
| 519         | 28         | 520         | 26         | 520         | 28         | 522         | 1          | 520         | 1          | 520         | 2          |
| <b>616</b>  | <b>1</b>   | <b>616</b>  | <b>1</b>   | <b>618</b>  | <b>1</b>   | <b>581</b>  | <b>15</b>  | <b>580</b>  | <b>12</b>  | <b>582</b>  | <b>11</b>  |
| <b>651</b>  | <b>12</b>  | <b>650</b>  | <b>10</b>  | <b>649</b>  | <b>10</b>  | <b>635</b>  | <b>0.3</b> | <b>634</b>  | <b>0.3</b> | <b>634</b>  | <b>0.3</b> |
| <b>684</b>  | <b>3</b>   | <b>684</b>  | <b>3</b>   | <b>686</b>  | <b>3</b>   | <b>688</b>  | <b>5</b>   | <b>690</b>  | <b>5</b>   | <b>690</b>  | <b>4</b>   |
| <b>756</b>  | <b>7</b>   | <b>754</b>  | <b>7</b>   | <b>754</b>  | <b>9</b>   | <b>761</b>  | <b>12</b>  | <b>759</b>  | <b>11</b>  | <b>757</b>  | <b>12</b>  |
| <b>793</b>  | <b>3</b>   | <b>792</b>  | <b>3</b>   | <b>792</b>  | <b>3</b>   | <b>813</b>  | <b>13</b>  | <b>812</b>  | <b>13</b>  | <b>812</b>  | <b>13</b>  |
| <b>831</b>  | <b>1</b>   | <b>831</b>  | <b>2</b>   | <b>830</b>  | <b>3</b>   | <b>847</b>  | <b>15</b>  | <b>843</b>  | <b>29</b>  | <b>840</b>  | <b>42</b>  |
| <b>882</b>  | <b>92</b>  | <b>879</b>  | <b>96</b>  | <b>877</b>  | <b>102</b> | <b>860</b>  | <b>41</b>  | <b>857</b>  | <b>31</b>  | <b>857</b>  | <b>25</b>  |
| <b>931</b>  | <b>11</b>  | <b>931</b>  | <b>10</b>  | <b>929</b>  | <b>10</b>  | <b>940</b>  | <b>2</b>   | <b>941</b>  | <b>2</b>   | <b>940</b>  | <b>3</b>   |
| <b>956</b>  | <b>3</b>   | <b>956</b>  | <b>3</b>   | <b>954</b>  | <b>3</b>   | <b>951</b>  | <b>13</b>  | <b>950</b>  | <b>13</b>  | <b>950</b>  | <b>12</b>  |
| <b>961</b>  | <b>14</b>  | <b>961</b>  | <b>15</b>  | <b>960</b>  | <b>14</b>  | <b>961</b>  | <b>3</b>   | <b>962</b>  | <b>2</b>   | <b>961</b>  | <b>2</b>   |
| <b>1003</b> | <b>7</b>   | <b>1003</b> | <b>7</b>   | <b>1005</b> | <b>7</b>   | <b>986</b>  | <b>24</b>  | <b>985</b>  | <b>26</b>  | <b>986</b>  | <b>28</b>  |
| <b>1030</b> | <b>26</b>  | <b>1031</b> | <b>27</b>  | <b>1035</b> | <b>27</b>  | <b>1059</b> | <b>21</b>  | <b>1059</b> | <b>23</b>  | <b>1059</b> | <b>25</b>  |
| <b>1078</b> | <b>23</b>  | <b>1076</b> | <b>26</b>  | <b>1077</b> | <b>34</b>  | <b>1083</b> | <b>20</b>  | <b>1082</b> | <b>19</b>  | <b>1080</b> | <b>18</b>  |
| <b>1115</b> | <b>89</b>  | <b>1115</b> | <b>91</b>  | <b>1116</b> | <b>96</b>  | <b>1127</b> | <b>63</b>  | <b>1126</b> | <b>64</b>  | <b>1127</b> | <b>68</b>  |
| <b>1185</b> | <b>9</b>   | <b>1185</b> | <b>11</b>  | <b>1186</b> | <b>13</b>  | <b>1138</b> | <b>12</b>  | <b>1139</b> | <b>13</b>  | <b>1138</b> | <b>12</b>  |
| <b>1231</b> | <b>28</b>  | <b>1231</b> | <b>29</b>  | <b>1231</b> | <b>29</b>  | <b>1237</b> | <b>49</b>  | <b>1237</b> | <b>50</b>  | <b>1237</b> | <b>50</b>  |
| <b>1256</b> | <b>21</b>  | <b>1254</b> | <b>21</b>  | <b>1252</b> | <b>26</b>  | <b>1269</b> | <b>22</b>  | <b>1267</b> | <b>23</b>  | <b>1266</b> | <b>24</b>  |
| <b>1295</b> | <b>13</b>  | <b>1294</b> | <b>14</b>  | <b>1296</b> | <b>18</b>  | <b>1304</b> | <b>41</b>  | <b>1302</b> | <b>55</b>  | <b>1301</b> | <b>65</b>  |
| <b>1322</b> | <b>132</b> | <b>1315</b> | <b>168</b> | <b>1308</b> | <b>181</b> | <b>1326</b> | <b>68</b>  | <b>1320</b> | <b>79</b>  | <b>1316</b> | <b>79</b>  |
| <b>1335</b> | <b>3</b>   | <b>1335</b> | <b>4</b>   | <b>1332</b> | <b>41</b>  | <b>1334</b> | <b>5</b>   | <b>1335</b> | <b>4</b>   | <b>1335</b> | <b>4</b>   |
| <b>1346</b> | <b>99</b>  | <b>1339</b> | <b>76</b>  | <b>1335</b> | <b>32</b>  | <b>1353</b> | <b>39</b>  | <b>1350</b> | <b>44</b>  | <b>1348</b> | <b>44</b>  |
| <b>1371</b> | <b>49</b>  | <b>1368</b> | <b>29</b>  | <b>1368</b> | <b>22</b>  | <b>1369</b> | <b>69</b>  | <b>1365</b> | <b>43</b>  | <b>1365</b> | <b>35</b>  |
| <b>1417</b> | <b>199</b> | <b>1407</b> | <b>218</b> | <b>1402</b> | <b>234</b> | <b>1426</b> | <b>176</b> | <b>1417</b> | <b>249</b> | <b>1411</b> | <b>269</b> |
| <b>1428</b> | <b>12</b>  | <b>1427</b> | <b>9</b>   | <b>1428</b> | <b>8</b>   | <b>1431</b> | <b>71</b>  | <b>1431</b> | <b>22</b>  | <b>1431</b> | <b>19</b>  |
| <b>1433</b> | <b>19</b>  | <b>1433</b> | <b>16</b>  | <b>1434</b> | <b>14</b>  | <b>1440</b> | <b>16</b>  | <b>1437</b> | <b>31</b>  | <b>1437</b> | <b>26</b>  |
| <b>1442</b> | <b>18</b>  | <b>1442</b> | <b>15</b>  | <b>1442</b> | <b>14</b>  | <b>1441</b> | <b>53</b>  | <b>1441</b> | <b>18</b>  | <b>1441</b> | <b>17</b>  |
| <b>1447</b> | <b>12</b>  | <b>1447</b> | <b>11</b>  | <b>1446</b> | <b>13</b>  | <b>1453</b> | <b>10</b>  | <b>1453</b> | <b>8</b>   | <b>1454</b> | <b>7</b>   |
| <b>1589</b> | <b>12</b>  | <b>1587</b> | <b>10</b>  | <b>1589</b> | <b>8</b>   | <b>1578</b> | <b>11</b>  | <b>1578</b> | <b>6</b>   | <b>1576</b> | <b>5</b>   |
| <b>1629</b> | <b>36</b>  | <b>1629</b> | <b>21</b>  | <b>1628</b> | <b>16</b>  | <b>1633</b> | <b>8</b>   | <b>1632</b> | <b>8</b>   | <b>1632</b> | <b>8</b>   |
| <b>1650</b> | <b>336</b> | <b>1661</b> | <b>363</b> | <b>1667</b> | <b>352</b> | <b>1649</b> | <b>307</b> | <b>1660</b> | <b>325</b> | <b>1666</b> | <b>317</b> |
| 2959        | 6          | 2957        | 5          | 2945        | 285        | 2935        | 831        | 2961        | 385        | 2924        | 333        |
| 2973        | 212        | 2973        | 18         | 2956        | 8          | 2966        | 6          | 2964        | 191        | 2963        | 16         |
| 2978        | 422        | 2979        | 8          | 2973        | 16         | 2973        | 13         | 2971        | 317        | 2972        | 51         |
| 2981        | 33         | 2994        | 80         | 2980        | 11         | 2978        | 10         | 2974        | 212        | 2978        | 33         |
| 3007        | 2          | 3006        | 4          | 3005        | 4          | 3007        | 5          | 2979        | 64         | 2984        | 729        |
| 3025        | 16         | 3024        | 853        | 3023        | 24         | 3020        | 0.2        | 3008        | 1          | 3010        | 9          |
| 3029        | 5          | 3026        | 63         | 3028        | 6          | 3030        | 292        | 3020        | 2          | 3019        | 2          |
| 3058        | 3          | 3028        | 64         | 3036        | 764        | 3030        | 31         | 3030        | 7          | 3030        | 7          |
| 3066        | 1          | 3057        | 10         | 3056        | 13         | 3058        | 6          | 3058        | 6          | 3056        | 7          |
| 3068        | 424        | 3065        | 1          | 3065        | 1          | 3067        | 1          | 3067        | 2          | 3066        | 2          |
| 3414        | 73         | 3418        | 71         | 3420        | 69         | 3424        | 81         | 3427        | 77         | 3429        | 76         |

<sup>a</sup> Bold indicates the region of the IR spectrum included in the present experimental study.

**Table S10.** Vibrational frequencies ( $\text{cm}^{-1}$ ) scaled by 0.975 and IR intensities ( $\text{kM/mole}$ ) for the [COOH] ctggg conformer of  $\text{M}^+(\text{Met})$  calculated at B3LYP/6-311+G(d,p) ( $\text{M}^+ = \text{Li}^+, \text{Na}^+, \text{and K}^+$ ) and B3LYP/HW\*/6-311+G(d,p) ( $\text{M}^+ = \text{Rb}^+ \text{ and } \text{Cs}^+$ ) levels of theory<sup>a</sup>

| $\text{Li}^+(\text{Met})$ |            | $\text{Na}^+(\text{Met})$ |            | $\text{K}^+(\text{Met})$ |            | $\text{Rb}^+(\text{Met})$ |            | $\text{Cs}^+(\text{Met})$ |            |
|---------------------------|------------|---------------------------|------------|--------------------------|------------|---------------------------|------------|---------------------------|------------|
| 40                        | 4          | 32                        | 6          | 26                       | 5          | 23                        | 4          | 20                        | 3          |
| 62                        | 7          | 47                        | 7          | 43                       | 9          | 38                        | 5          | 40                        | 4          |
| 83                        | 17         | 75                        | 8          | 68                       | 4          | 57                        | 7          | 55                        | 5          |
| 107                       | 21         | 80                        | 8          | 71                       | 11         | 66                        | 1          | 65                        | 0.4        |
| 136                       | 120        | 100                       | 19         | 83                       | 2          | 80                        | 1          | 79                        | 1          |
| 146                       | 4          | 133                       | 11         | 120                      | 8          | 98                        | 6          | 85                        | 5          |
| 155                       | 58         | 153                       | 3          | 153                      | 6          | 145                       | 13         | 141                       | 10         |
| 193                       | 20         | 182                       | 13         | 171                      | 24         | 160                       | 2          | 154                       | 1          |
| 253                       | 30         | 228                       | 24         | 192                      | 9          | 190                       | 8          | 188                       | 8          |
| 264                       | 34         | 268                       | 17         | 261                      | 8          | 262                       | 6          | 262                       | 7          |
| 301                       | 37         | 292                       | 36         | 292                      | 18         | 291                       | 12         | 295                       | 10         |
| 332                       | 17         | 321                       | 16         | 324                      | 13         | 324                       | 12         | 323                       | 10         |
| 453                       | 108        | 368                       | 14         | 372                      | 18         | 372                       | 17         | 377                       | 17         |
| 466                       | 13         | 429                       | 16         | 425                      | 16         | 418                       | 16         | 419                       | 16         |
| 503                       | 2          | 503                       | 1          | 504                      | 1          | 504                       | 1          | 504                       | 2          |
| 553                       | 44         | 532                       | 4          | 528                      | 4          | 526                       | 4          | 526                       | 3          |
| <b>573</b>                | <b>4</b>   | 564                       | 2          | <b>561</b>               | <b>2</b>   | <b>559</b>                | <b>2</b>   | <b>557</b>                | <b>2</b>   |
| <b>619</b>                | <b>3</b>   | 618                       | 2          | <b>619</b>               | <b>2</b>   | <b>619</b>                | <b>2</b>   | <b>617</b>                | <b>3</b>   |
| <b>685</b>                | <b>2</b>   | 685                       | 2          | <b>685</b>               | <b>2</b>   | <b>686</b>                | <b>2</b>   | <b>686</b>                | <b>2</b>   |
| <b>743</b>                | <b>5</b>   | 742                       | 3          | <b>738</b>               | <b>4</b>   | <b>736</b>                | <b>4</b>   | <b>735</b>                | <b>5</b>   |
| <b>806</b>                | <b>15</b>  | 807                       | 11         | <b>805</b>               | <b>11</b>  | <b>805</b>                | <b>10</b>  | <b>804</b>                | <b>11</b>  |
| <b>833</b>                | <b>8</b>   | 833                       | 3          | <b>830</b>               | <b>3</b>   | <b>829</b>                | <b>4</b>   | <b>828</b>                | <b>5</b>   |
| <b>839</b>                | <b>2</b>   | 841                       | 5          | <b>843</b>               | <b>6</b>   | <b>843</b>                | <b>6</b>   | <b>844</b>                | <b>6</b>   |
| <b>931</b>                | <b>24</b>  | <b>920</b>                | <b>58</b>  | <b>917</b>               | <b>68</b>  | <b>913</b>                | <b>77</b>  | <b>910</b>                | <b>82</b>  |
| <b>955</b>                | <b>5</b>   | <b>952</b>                | <b>3</b>   | <b>951</b>               | <b>4</b>   | <b>953</b>                | <b>39</b>  | <b>951</b>                | <b>41</b>  |
| <b>959</b>                | <b>56</b>  | <b>954</b>                | <b>51</b>  | <b>953</b>               | <b>47</b>  | <b>953</b>                | <b>8</b>   | <b>953</b>                | <b>4</b>   |
| <b>1001</b>               | <b>21</b>  | <b>1000</b>               | <b>16</b>  | <b>1000</b>              | <b>13</b>  | <b>1001</b>               | <b>13</b>  | <b>999</b>                | <b>27</b>  |
| <b>1026</b>               | <b>25</b>  | <b>1021</b>               | <b>18</b>  | <b>1021</b>              | <b>20</b>  | <b>1011</b>               | <b>62</b>  | <b>1003</b>               | <b>56</b>  |
| <b>1084</b>               | <b>24</b>  | <b>1057</b>               | <b>86</b>  | <b>1034</b>              | <b>83</b>  | <b>1024</b>               | <b>39</b>  | <b>1025</b>               | <b>31</b>  |
| <b>1117</b>               | <b>67</b>  | <b>1091</b>               | <b>9</b>   | <b>1094</b>              | <b>9</b>   | <b>1095</b>               | <b>9</b>   | <b>1095</b>               | <b>10</b>  |
| <b>1123</b>               | <b>123</b> | <b>1146</b>               | <b>19</b>  | <b>1150</b>              | <b>6</b>   | <b>1149</b>               | <b>6</b>   | <b>1150</b>               | <b>7</b>   |
| <b>1158</b>               | <b>17</b>  | <b>1150</b>               | <b>23</b>  | <b>1157</b>              | <b>19</b>  | <b>1160</b>               | <b>17</b>  | <b>1161</b>               | <b>14</b>  |
| <b>1185</b>               | <b>17</b>  | <b>1179</b>               | <b>6</b>   | <b>1180</b>              | <b>7</b>   | <b>1180</b>               | <b>8</b>   | <b>1179</b>               | <b>9</b>   |
| <b>1254</b>               | <b>42</b>  | <b>1252</b>               | <b>37</b>  | <b>1252</b>              | <b>35</b>  | <b>1252</b>               | <b>34</b>  | <b>1250</b>               | <b>31</b>  |
| <b>1267</b>               | <b>5</b>   | <b>1267</b>               | <b>3</b>   | <b>1268</b>              | <b>1</b>   | <b>1268</b>               | <b>1</b>   | <b>1268</b>               | <b>0</b>   |
| <b>1307</b>               | <b>5</b>   | <b>1307</b>               | <b>4</b>   | <b>1307</b>              | <b>5</b>   | <b>1307</b>               | <b>5</b>   | <b>1307</b>               | <b>6</b>   |
| <b>1336</b>               | <b>3</b>   | <b>1335</b>               | <b>2</b>   | <b>1333</b>              | <b>1</b>   | <b>1335</b>               | <b>1</b>   | <b>1335</b>               | <b>1</b>   |
| <b>1348</b>               | <b>41</b>  | <b>1351</b>               | <b>26</b>  | <b>1353</b>              | <b>21</b>  | <b>1353</b>               | <b>18</b>  | <b>1354</b>               | <b>18</b>  |
| <b>1357</b>               | <b>24</b>  | <b>1359</b>               | <b>8</b>   | <b>1361</b>              | <b>6</b>   | <b>1362</b>               | <b>6</b>   | <b>1364</b>               | <b>5</b>   |
| <b>1384</b>               | <b>496</b> | <b>1394</b>               | <b>466</b> | <b>1403</b>              | <b>445</b> | <b>1404</b>               | <b>434</b> | <b>1407</b>               | <b>422</b> |
| <b>1428</b>               | <b>6</b>   | <b>1430</b>               | <b>7</b>   | <b>1429</b>              | <b>5</b>   | <b>1429</b>               | <b>5</b>   | <b>1429</b>               | <b>5</b>   |
| <b>1432</b>               | <b>21</b>  | <b>1434</b>               | <b>19</b>  | <b>1433</b>              | <b>20</b>  | <b>1433</b>               | <b>20</b>  | <b>1433</b>               | <b>20</b>  |
| <b>1439</b>               | <b>16</b>  | <b>1440</b>               | <b>18</b>  | <b>1443</b>              | <b>14</b>  | <b>1441</b>               | <b>16</b>  | <b>1442</b>               | <b>17</b>  |
| <b>1441</b>               | <b>15</b>  | <b>1442</b>               | <b>11</b>  | <b>1443</b>              | <b>14</b>  | <b>1443</b>               | <b>10</b>  | <b>1444</b>               | <b>9</b>   |



|             |            |             |            |             |            |             |            |             |            |
|-------------|------------|-------------|------------|-------------|------------|-------------|------------|-------------|------------|
| <b>1609</b> | <b>28</b>  | <b>1613</b> | <b>25</b>  | <b>1616</b> | <b>24</b>  | <b>1616</b> | <b>23</b>  | <b>1615</b> | <b>24</b>  |
| <b>1696</b> | <b>496</b> | <b>1724</b> | <b>428</b> | <b>1733</b> | <b>420</b> | <b>1743</b> | <b>399</b> | <b>1747</b> | <b>387</b> |
| 2444        | 663        | 2779        | 658        | 2902        | 633        | 2961        | 3          | 2961        | 2          |
| 2965        | 5          | 2962        | 6          | 2962        | 9          | 2968        | 12         | 2968        | 14         |
| 2970        | 12         | 2969        | 13         | 2969        | 15         | 2972        | 48         | 2971        | 18         |
| 2974        | 8          | 2973        | 10         | 2972        | 11         | 2975        | 6          | 2977        | 8          |
| 2975        | 11         | 2975        | 13         | 2975        | 15         | 2983        | 552        | 3003        | 1          |
| 3009        | 5          | 3007        | 7          | 3005        | 10         | 3005        | 22         | 3019        | 350        |
| 3021        | 9          | 3020        | 11         | 3020        | 13         | 3019        | 18         | 3022        | 251        |
| 3052        | 6          | 3050        | 7          | 3049        | 7          | 3048        | 7          | 3048        | 8          |
| 3063        | 1          | 3062        | 2          | 3061        | 2          | 3061        | 2          | 3060        | 2          |
| 3283        | 244        | 3312        | 191        | 3329        | 166        | 3335        | 159        | 3345        | 134        |
| 3483        | 61         | 3489        | 54         | 3492        | 51         | 3492        | 48         | 3495        | 47         |

<sup>a</sup> Bold indicates the region of the IR spectrum included in the present experimental study.

**Table S11.** Vibrational frequencies ( $\text{cm}^{-1}$ ) scaled by 0.975 and IR intensities (kM/mole) for the [COOH] cgtgg and ctggt conformers of  $\text{M}^+(\text{Met})$  calculated at B3LYP/6-311+G(d,p) ( $\text{M}^+ = \text{K}^+$ ) and B3LYP/HW\*/6-311+G(d,p) ( $\text{M}^+ = \text{Rb}^+$  and  $\text{Cs}^+$ )<sup>a</sup>

| [COOH] cgtgg             |           |                           |           |                           | [COOH] ctggt             |            |                           |            |                           |            |            |
|--------------------------|-----------|---------------------------|-----------|---------------------------|--------------------------|------------|---------------------------|------------|---------------------------|------------|------------|
| $\text{K}^+(\text{Met})$ |           | $\text{Rb}^+(\text{Met})$ |           | $\text{Cs}^+(\text{Met})$ | $\text{K}^+(\text{Met})$ |            | $\text{Rb}^+(\text{Met})$ |            | $\text{Cs}^+(\text{Met})$ |            |            |
| 31                       | 3         | 29                        | 1         | 28                        | 2                        | 27         | 3                         | 22         | 1                         | 16         | 1          |
| 50                       | 6         | 43                        | 4         | 39                        | 3                        | 48         | 2                         | 47         | 2                         | 38         | 2          |
| 53                       | 6         | 51                        | 4         | 50                        | 2                        | 59         | 8                         | 53         | 5                         | 46         | 7          |
| 68                       | 13        | 63                        | 7         | 63                        | 6                        | 67         | 15                        | 57         | 10                        | 51         | 4          |
| 99                       | 3         | 89                        | 3         | 81                        | 4                        | 91         | 2                         | 88         | 1                         | 84         | 2          |
| 132                      | 15        | 108                       | 9         | 101                       | 5                        | 129        | 9                         | 103        | 7                         | 87         | 5          |
| 137                      | 11        | 131                       | 8         | 130                       | 8                        | 138        | 17                        | 132        | 11                        | 132        | 11         |
| 165                      | 4         | 161                       | 4         | 159                       | 4                        | 172        | 4                         | 170        | 4                         | 169        | 1          |
| 197                      | 11        | 195                       | 9         | 193                       | 8                        | 187        | 13                        | 175        | 5                         | 173        | 6          |
| 221                      | 13        | 209                       | 2         | 206                       | 1                        | 210        | 4                         | 208        | 1                         | 206        | 1          |
| 302                      | 5         | 300                       | 3         | 299                       | 3                        | 285        | 23                        | 285        | 16                        | 287        | 14         |
| 351                      | 6         | 349                       | 1         | 348                       | 10                       | 325        | 17                        | 325        | 15                        | 323        | 14         |
| 355                      | 26        | 357                       | 27        | 350                       | 10                       | 368        | 18                        | 367        | 17                        | 367        | 17         |
| 391                      | 12        | 385                       | 14        | 370                       | 18                       | 412        | 8                         | 404        | 8                         | 399        | 7          |
| 431                      | 1         | 431                       | 1         | 430                       | 1                        | 511        | 1                         | 512        | 1                         | 512        | 1          |
| 540                      | 5         | 537                       | 3         | 536                       | 4                        | 528        | 5                         | 526        | 4                         | 524        | 4          |
| <b>623</b>               | <b>2</b>  | <b>623</b>                | <b>1</b>  | <b>622</b>                | <b>2</b>                 | <b>562</b> | <b>2</b>                  | <b>561</b> | <b>2</b>                  | <b>558</b> | <b>2</b>   |
| <b>632</b>               | <b>4</b>  | <b>633</b>                | <b>5</b>  | <b>631</b>                | <b>4</b>                 | <b>644</b> | <b>0.3</b>                | <b>645</b> | <b>0.4</b>                | <b>644</b> | <b>0.4</b> |
| <b>687</b>               | <b>2</b>  | <b>687</b>                | <b>2</b>  | <b>689</b>                | <b>2</b>                 | <b>693</b> | <b>3</b>                  | <b>693</b> | <b>3</b>                  | <b>693</b> | <b>3</b>   |
| <b>726</b>               | <b>5</b>  | <b>724</b>                | <b>5</b>  | <b>724</b>                | <b>5</b>                 | <b>741</b> | <b>4</b>                  | <b>739</b> | <b>4</b>                  | <b>737</b> | <b>5</b>   |
| <b>790</b>               | <b>1</b>  | <b>791</b>                | <b>1</b>  | <b>790</b>                | <b>1</b>                 | <b>805</b> | <b>6</b>                  | <b>805</b> | <b>6</b>                  | <b>805</b> | <b>6</b>   |
| <b>850</b>               | <b>12</b> | <b>849</b>                | <b>13</b> | <b>849</b>                | <b>16</b>                | <b>835</b> | <b>7</b>                  | <b>835</b> | <b>8</b>                  | <b>833</b> | <b>10</b>  |
| <b>878</b>               | <b>1</b>  | <b>877</b>                | <b>1</b>  | <b>876</b>                | <b>1</b>                 | <b>870</b> | <b>4</b>                  | <b>872</b> | <b>4</b>                  | <b>870</b> | <b>3</b>   |
| <b>937</b>               | <b>5</b>  | <b>936</b>                | <b>8</b>  | <b>937</b>                | <b>9</b>                 | <b>923</b> | <b>91</b>                 | <b>920</b> | <b>97</b>                 | <b>915</b> | <b>105</b> |
| <b>952</b>               | <b>27</b> | <b>952</b>                | <b>42</b> | <b>951</b>                | <b>61</b>                | <b>948</b> | <b>22</b>                 | <b>948</b> | <b>21</b>                 | <b>947</b> | <b>19</b>  |
| <b>965</b>               | <b>87</b> | <b>964</b>                | <b>75</b> | <b>961</b>                | <b>60</b>                | <b>966</b> | <b>5</b>                  | <b>965</b> | <b>5</b>                  | <b>964</b> | <b>4</b>   |
| <b>983</b>               | <b>19</b> | <b>982</b>                | <b>18</b> | <b>982</b>                | <b>22</b>                | <b>998</b> | <b>4</b>                  | <b>998</b> | <b>4</b>                  | <b>997</b> | <b>16</b>  |

|      |     |      |     |      |     |      |     |      |     |      |     |
|------|-----|------|-----|------|-----|------|-----|------|-----|------|-----|
| 1018 | 20  | 1015 | 18  | 1007 | 42  | 1019 | 35  | 1012 | 52  | 1001 | 53  |
| 1035 | 82  | 1025 | 80  | 1022 | 47  | 1038 | 75  | 1022 | 55  | 1020 | 39  |
| 1081 | 7   | 1081 | 9   | 1082 | 9   | 1097 | 6   | 1098 | 6   | 1097 | 6   |
| 1123 | 7   | 1123 | 9   | 1124 | 10  | 1133 | 5   | 1133 | 7   | 1133 | 7   |
| 1172 | 27  | 1171 | 24  | 1172 | 22  | 1158 | 21  | 1158 | 15  | 1159 | 12  |
| 1206 | 2   | 1206 | 1   | 1205 | 1   | 1174 | 10  | 1175 | 12  | 1175 | 13  |
| 1262 | 15  | 1262 | 16  | 1263 | 21  | 1255 | 40  | 1255 | 39  | 1254 | 39  |
| 1271 | 35  | 1272 | 30  | 1270 | 24  | 1265 | 7   | 1263 | 5   | 1262 | 3   |
| 1306 | 5   | 1305 | 5   | 1305 | 4   | 1304 | 4   | 1303 | 4   | 1304 | 5   |
| 1329 | 16  | 1330 | 14  | 1331 | 13  | 1334 | 3   | 1334 | 3   | 1333 | 3   |
| 1334 | 0   | 1335 | 0   | 1335 | 1   | 1356 | 18  | 1356 | 15  | 1356 | 13  |
| 1352 | 3   | 1353 | 3   | 1354 | 3   | 1358 | 5   | 1360 | 5   | 1361 | 6   |
| 1403 | 497 | 1410 | 480 | 1406 | 469 | 1403 | 442 | 1405 | 428 | 1405 | 415 |
| 1425 | 7   | 1424 | 6   | 1426 | 6   | 1432 | 13  | 1432 | 13  | 1432 | 13  |
| 1434 | 12  | 1434 | 12  | 1434 | 12  | 1440 | 22  | 1441 | 18  | 1440 | 20  |
| 1442 | 11  | 1442 | 11  | 1442 | 11  | 1441 | 10  | 1442 | 14  | 1441 | 12  |
| 1449 | 12  | 1449 | 12  | 1449 | 10  | 1453 | 6   | 1454 | 6   | 1453 | 6   |
| 1634 | 18  | 1634 | 19  | 1635 | 19  | 1621 | 22  | 1624 | 23  | 1622 | 23  |
| 1735 | 490 | 1745 | 467 | 1749 | 457 | 1733 | 424 | 1743 | 402 | 1746 | 393 |
| 2902 | 695 | 2952 | 22  | 2954 | 2   | 2892 | 635 | 2953 | 8   | 2954 | 18  |
| 2953 | 12  | 2961 | 405 | 2965 | 5   | 2952 | 32  | 2962 | 29  | 2962 | 3   |
| 2967 | 12  | 2966 | 30  | 2966 | 28  | 2963 | 16  | 2966 | 20  | 2965 | 21  |
| 2967 | 19  | 2968 | 238 | 2974 | 9   | 2967 | 20  | 2972 | 501 | 2975 | 11  |
| 2976 | 8   | 2975 | 9   | 3002 | 133 | 2976 | 8   | 2977 | 99  | 3007 | 13  |
| 3002 | 13  | 3001 | 17  | 3006 | 531 | 3007 | 11  | 3008 | 13  | 3012 | 37  |
| 3022 | 6   | 3022 | 7   | 3021 | 7   | 3012 | 7   | 3013 | 13  | 3018 | 561 |
| 3046 | 8   | 3046 | 9   | 3044 | 9   | 3047 | 7   | 3045 | 7   | 3044 | 8   |
| 3060 | 2   | 3060 | 2   | 3059 | 3   | 3063 | 2   | 3061 | 3   | 3061 | 3   |
| 3337 | 189 | 3344 | 174 | 3350 | 164 | 3327 | 182 | 3334 | 166 | 3343 | 148 |
| 3468 | 47  | 3468 | 46  | 3472 | 46  | 3490 | 55  | 3491 | 52  | 3492 | 51  |

<sup>a</sup> Bold indicates the region of the IR spectrum included in the present experimental study.

**Table S12.** Vibrational frequencies ( $\text{cm}^{-1}$ ) scaled by 0.975 and IR intensities ( $\text{kM/mole}$ ) for the [COOH,S] cgggg conformer of  $\text{M}^+(\text{Met})$  calculated at B3LYP/6-311+G(d,p) ( $\text{M}^+ = \text{Li}^+, \text{Na}^+, \text{and K}^+$ ) and B3LYP/HW\*/6-311+G(d,p) ( $\text{M}^+ = \text{Rb}^+ \text{ and } \text{Cs}^+$ ) levels of theory<sup>a</sup>

| $\text{Na}^+(\text{Met})$ |    | $\text{K}^+(\text{Met})$ |    | $\text{Rb}^+(\text{Met})$ |     | $\text{Cs}^+(\text{Met})$ |     |
|---------------------------|----|--------------------------|----|---------------------------|-----|---------------------------|-----|
| 49                        | 5  | 45                       | 3  | 37                        | 5   | 29                        | 5   |
| 82                        | 1  | 62                       | 4  | 41                        | 4   | 35                        | 1   |
| 93                        | 13 | 63                       | 15 | 51                        | 3   | 50                        | 4   |
| 106                       | 14 | 80                       | 10 | 69                        | 6   | 70                        | 4   |
| 124                       | 15 | 101                      | 2  | 88                        | 0.4 | 83                        | 1   |
| 142                       | 1  | 124                      | 2  | 110                       | 4   | 100                       | 6   |
| 166                       | 1  | 161                      | 4  | 138                       | 10  | 127                       | 5   |
| 180                       | 6  | 169                      | 16 | 154                       | 0.3 | 152                       | 0.2 |
| 219                       | 20 | 188                      | 10 | 180                       | 2   | 180                       | 2   |
| 243                       | 30 | 218                      | 12 | 217                       | 11  | 219                       | 10  |

Supplementary Material (ESI) for *PCCP*  
 This journal is © the Owner Societies 2010

|             |            |             |            |             |            |             |            |
|-------------|------------|-------------|------------|-------------|------------|-------------|------------|
| 287         | 1          | 287         | 14         | 275         | 20         | 266         | 19         |
| 301         | 23         | 291         | 6          | 287         | 1          | 290         | 1          |
| 330         | 16         | 331         | 18         | 327         | 17         | 329         | 17         |
| 378         | 1          | 381         | 1          | 375         | 2          | 376         | 2          |
| 460         | 2          | 464         | 3          | 462         | 2          | 466         | 2          |
| 534         | 4          | 531         | 4          | 530         | 4          | 530         | 4          |
| 603         | 3          | <b>610</b>  | <b>2</b>   | <b>612</b>  | <b>2</b>   | <b>611</b>  | <b>2</b>   |
| 636         | 6          | <b>624</b>  | <b>6</b>   | <b>622</b>  | <b>6</b>   | <b>619</b>  | <b>5</b>   |
| 682         | 3          | <b>683</b>  | <b>3</b>   | <b>684</b>  | <b>2</b>   | <b>686</b>  | <b>2</b>   |
| 718         | 11         | <b>716</b>  | <b>11</b>  | <b>715</b>  | <b>11</b>  | <b>714</b>  | <b>12</b>  |
| 799         | 14         | <b>794</b>  | <b>14</b>  | <b>791</b>  | <b>14</b>  | <b>789</b>  | <b>13</b>  |
| 820         | 2          | <b>821</b>  | <b>3</b>   | <b>821</b>  | <b>4</b>   | <b>821</b>  | <b>3</b>   |
| 862         | 43         | <b>858</b>  | <b>52</b>  | <b>856</b>  | <b>56</b>  | <b>854</b>  | <b>61</b>  |
| <b>905</b>  | <b>38</b>  | <b>905</b>  | <b>34</b>  | <b>905</b>  | <b>37</b>  | <b>905</b>  | <b>40</b>  |
| <b>930</b>  | <b>66</b>  | <b>929</b>  | <b>64</b>  | <b>920</b>  | <b>74</b>  | <b>918</b>  | <b>72</b>  |
| <b>953</b>  | <b>68</b>  | <b>949</b>  | <b>66</b>  | <b>946</b>  | <b>58</b>  | <b>944</b>  | <b>50</b>  |
| <b>956</b>  | <b>17</b>  | <b>954</b>  | <b>12</b>  | <b>953</b>  | <b>8</b>   | <b>951</b>  | <b>8</b>   |
| <b>983</b>  | <b>12</b>  | <b>982</b>  | <b>8</b>   | <b>981</b>  | <b>6</b>   | <b>980</b>  | <b>4</b>   |
| <b>1011</b> | <b>4</b>   | <b>1017</b> | <b>6</b>   | <b>1016</b> | <b>6</b>   | <b>1021</b> | <b>7</b>   |
| <b>1070</b> | <b>14</b>  | <b>1072</b> | <b>14</b>  | <b>1071</b> | <b>14</b>  | <b>1072</b> | <b>15</b>  |
| <b>1131</b> | <b>16</b>  | <b>1130</b> | <b>16</b>  | <b>1129</b> | <b>18</b>  | <b>1131</b> | <b>17</b>  |
| <b>1167</b> | <b>9</b>   | <b>1161</b> | <b>9</b>   | <b>1160</b> | <b>8</b>   | <b>1159</b> | <b>9</b>   |
| <b>1216</b> | <b>3</b>   | <b>1214</b> | <b>2</b>   | <b>1213</b> | <b>1</b>   | <b>1213</b> | <b>1</b>   |
| <b>1232</b> | <b>11</b>  | <b>1230</b> | <b>10</b>  | <b>1230</b> | <b>9</b>   | <b>1230</b> | <b>9</b>   |
| <b>1289</b> | <b>24</b>  | <b>1287</b> | <b>23</b>  | <b>1287</b> | <b>23</b>  | <b>1287</b> | <b>22</b>  |
| <b>1314</b> | <b>8</b>   | <b>1314</b> | <b>4</b>   | <b>1316</b> | <b>5</b>   | <b>1317</b> | <b>3</b>   |
| <b>1327</b> | <b>9</b>   | <b>1327</b> | <b>11</b>  | <b>1328</b> | <b>10</b>  | <b>1328</b> | <b>10</b>  |
| <b>1337</b> | <b>1</b>   | <b>1336</b> | <b>1</b>   | <b>1336</b> | <b>1</b>   | <b>1335</b> | <b>3</b>   |
| <b>1354</b> | <b>75</b>  | <b>1352</b> | <b>46</b>  | <b>1355</b> | <b>44</b>  | <b>1356</b> | <b>34</b>  |
| <b>1378</b> | <b>274</b> | <b>1380</b> | <b>308</b> | <b>1383</b> | <b>308</b> | <b>1386</b> | <b>316</b> |
| <b>1428</b> | <b>4</b>   | <b>1429</b> | <b>3</b>   | <b>1427</b> | <b>5</b>   | <b>1428</b> | <b>5</b>   |
| <b>1432</b> | <b>16</b>  | <b>1434</b> | <b>16</b>  | <b>1432</b> | <b>15</b>  | <b>1432</b> | <b>15</b>  |
| <b>1442</b> | <b>19</b>  | <b>1444</b> | <b>20</b>  | <b>1442</b> | <b>20</b>  | <b>1443</b> | <b>19</b>  |
| <b>1445</b> | <b>14</b>  | <b>1445</b> | <b>11</b>  | <b>1445</b> | <b>10</b>  | <b>1445</b> | <b>9</b>   |
| <b>1624</b> | <b>57</b>  | <b>1625</b> | <b>58</b>  | <b>1623</b> | <b>59</b>  | <b>1623</b> | <b>60</b>  |
| <b>1753</b> | <b>306</b> | <b>1756</b> | <b>317</b> | <b>1763</b> | <b>317</b> | <b>1764</b> | <b>318</b> |
| 2963        | 6          | 2961        | 7          | 2957        | 9          | 2956        | 10         |
| 2975        | 9          | 2971        | 12         | 2969        | 14         | 2968        | 16         |
| 2985        | 5          | 2982        | 6          | 2979        | 8          | 2978        | 8          |
| 2989        | 4          | 2986        | 6          | 2984        | 8          | 2982        | 10         |
| 3020        | 3          | 3018        | 3          | 3016        | 3          | 3015        | 3          |
| 3033        | 3          | 3029        | 5          | 3027        | 6          | 3026        | 8          |
| 3062        | 1          | 3056        | 4          | 3053        | 5          | 3050        | 5          |
| 3063        | 3          | 3058        | 3          | 3056        | 4          | 3054        | 4          |
| 3172        | 412        | 3178        | 431        | 3200        | 415        | 3212        | 416        |
| 3429        | 15         | 3433        | 12         | 3433        | 10         | 3435        | 9          |
| 3499        | 26         | 3503        | 25         | 3503        | 23         | 3504        | 23         |

<sup>a</sup> Bold indicates the region of the IR spectrum included in the present experimental study.

**Table S13.** Vibrational frequencies ( $\text{cm}^{-1}$ ) scaled by 0.975 and IR intensities ( $\text{kM/mole}$ ) for the [COOH,S] cgggt and cgcgg conformers of  $\text{M}^+(\text{Met})$  calculated at B3LYP/6-311+G(d,p) ( $\text{M}^+ = \text{K}^+$ ) and B3LYP/HW\*/6-311+G(d,p) ( $\text{M}^+ = \text{Rb}^+$  and  $\text{Cs}^+$ )<sup>a</sup>

| [COOH,S] cgggt           |            |                           |            |                           |            | [COOH,S] cgcgg           |            |                           |            |                           |            |
|--------------------------|------------|---------------------------|------------|---------------------------|------------|--------------------------|------------|---------------------------|------------|---------------------------|------------|
| $\text{K}^+(\text{Met})$ |            | $\text{Rb}^+(\text{Met})$ |            | $\text{Cs}^+(\text{Met})$ |            | $\text{K}^+(\text{Met})$ |            | $\text{Rb}^+(\text{Met})$ |            | $\text{Cs}^+(\text{Met})$ |            |
| 45                       | 5          | 24                        | 1          | 15                        | 3          | 51                       | 9          | 40                        | 8          | 35                        | 7          |
| 50                       | 3          | 41                        | 8          | 26                        | 8          | 59                       | 8          | 47                        | 7          | 42                        | 5          |
| 61                       | 9          | 46                        | 5          | 47                        | 3          | 68                       | 11         | 55                        | 0.3        | 55                        | 0.2        |
| 74                       | 20         | 54                        | 5          | 55                        | 2          | 86                       | 7          | 74                        | 3          | 69                        | 2          |
| 99                       | 4          | 81                        | 2          | 83                        | 4          | 95                       | 1          | 86                        | 1          | 83                        | 1          |
| 105                      | 1          | 100                       | 1          | 94                        | 1          | 115                      | 3          | 101                       | 2          | 94                        | 2          |
| 156                      | 3          | 140                       | 14         | 123                       | 11         | 165                      | 0.3        | 146                       | 12         | 131                       | 9          |
| 172                      | 11         | 161                       | 1          | 152                       | 1          | 179                      | 14         | 154                       | 1          | 154                       | 1          |
| 184                      | 17         | 175                       | 2          | 174                       | 2          | 181                      | 19         | 176                       | 8          | 173                       | 7          |
| 228                      | 0.3        | 229                       | 0.3        | 237                       | 1          | 224                      | 8          | 222                       | 7          | 222                       | 6          |
| 251                      | 8          | 253                       | 3          | 271                       | 11         | 308                      | 4          | 303                       | 11         | 301                       | 12         |
| 273                      | 19         | 262                       | 19         | 306                       | 11         | 316                      | 12         | 310                       | 3          | 310                       | 2          |
| 328                      | 22         | 329                       | 19         | 327                       | 14         | 323                      | 12         | 320                       | 16         | 321                       | 16         |
| 378                      | 0.2        | 375                       | 1          | 366                       | 4          | 350                      | 13         | 347                       | 9          | 346                       | 9          |
| 477                      | 3          | 487                       | 3          | 514                       | 5          | 435                      | 2          | 435                       | 2          | 434                       | 2          |
| 532                      | 6          | 532                       | 5          | 534                       | 7          | 531                      | 5          | 529                       | 4          | 527                       | 4          |
| <b>610</b>               | <b>4</b>   | <b>590</b>                | <b>4</b>   | <b>555</b>                | <b>4</b>   | <b>619</b>               | <b>4</b>   | <b>622</b>                | <b>4</b>   | <b>624</b>                | <b>4</b>   |
| <b>634</b>               | <b>1</b>   | <b>636</b>                | <b>1</b>   | <b>642</b>                | <b>2</b>   | <b>645</b>               | <b>5</b>   | <b>641</b>                | <b>5</b>   | <b>640</b>                | <b>5</b>   |
| <b>686</b>               | <b>3</b>   | <b>688</b>                | <b>2</b>   | <b>690</b>                | <b>2</b>   | <b>688</b>               | <b>3</b>   | <b>687</b>                | <b>3</b>   | <b>688</b>                | <b>2</b>   |
| <b>727</b>               | <b>11</b>  | <b>724</b>                | <b>10</b>  | <b>721</b>                | <b>9</b>   | <b>714</b>               | <b>13</b>  | <b>713</b>                | <b>14</b>  | <b>712</b>                | <b>14</b>  |
| <b>798</b>               | <b>14</b>  | <b>794</b>                | <b>11</b>  | <b>788</b>                | <b>17</b>  | <b>772</b>               | <b>4</b>   | <b>769</b>                | <b>4</b>   | <b>768</b>                | <b>5</b>   |
| <b>829</b>               | <b>8</b>   | <b>822</b>                | <b>23</b>  | <b>812</b>                | <b>62</b>  | <b>818</b>               | <b>5</b>   | <b>815</b>                | <b>5</b>   | <b>814</b>                | <b>6</b>   |
| <b>869</b>               | <b>71</b>  | <b>864</b>                | <b>70</b>  | <b>863</b>                | <b>52</b>  | <b>873</b>               | <b>88</b>  | <b>866</b>                | <b>90</b>  | <b>866</b>                | <b>90</b>  |
| <b>909</b>               | <b>13</b>  | <b>910</b>                | <b>7</b>   | <b>907</b>                | <b>85</b>  | <b>909</b>               | <b>92</b>  | <b>898</b>                | <b>98</b>  | <b>897</b>                | <b>98</b>  |
| <b>933</b>               | <b>74</b>  | <b>923</b>                | <b>86</b>  | <b>919</b>                | <b>7</b>   | <b>934</b>               | <b>6</b>   | <b>934</b>                | <b>3</b>   | <b>935</b>                | <b>4</b>   |
| <b>953</b>               | <b>32</b>  | <b>948</b>                | <b>38</b>  | <b>941</b>                | <b>36</b>  | <b>957</b>               | <b>11</b>  | <b>955</b>                | <b>9</b>   | <b>953</b>                | <b>6</b>   |
| <b>961</b>               | <b>26</b>  | <b>960</b>                | <b>11</b>  | <b>957</b>                | <b>1</b>   | <b>965</b>               | <b>34</b>  | <b>965</b>                | <b>29</b>  | <b>965</b>                | <b>30</b>  |
| <b>968</b>               | <b>6</b>   | <b>965</b>                | <b>1</b>   | <b>966</b>                | <b>7</b>   | <b>996</b>               | <b>6</b>   | <b>995</b>                | <b>7</b>   | <b>995</b>                | <b>7</b>   |
| <b>1032</b>              | <b>5</b>   | <b>1040</b>               | <b>6</b>   | <b>1053</b>               | <b>8</b>   | <b>1016</b>              | <b>13</b>  | <b>1018</b>               | <b>13</b>  | <b>1018</b>               | <b>12</b>  |
| <b>1071</b>              | <b>8</b>   | <b>1077</b>               | <b>8</b>   | <b>1088</b>               | <b>11</b>  | <b>1057</b>              | <b>10</b>  | <b>1058</b>               | <b>11</b>  | <b>1058</b>               | <b>12</b>  |
| <b>1126</b>              | <b>8</b>   | <b>1123</b>               | <b>4</b>   | <b>1114</b>               | <b>1</b>   | <b>1125</b>              | <b>9</b>   | <b>1125</b>               | <b>10</b>  | <b>1125</b>               | <b>10</b>  |
| <b>1166</b>              | <b>12</b>  | <b>1167</b>               | <b>15</b>  | <b>1176</b>               | <b>10</b>  | <b>1181</b>              | <b>11</b>  | <b>1178</b>               | <b>10</b>  | <b>1178</b>               | <b>11</b>  |
| <b>1209</b>              | <b>2</b>   | <b>1206</b>               | <b>4</b>   | <b>1195</b>               | <b>9</b>   | <b>1218</b>              | <b>4</b>   | <b>1216</b>               | <b>4</b>   | <b>1217</b>               | <b>3</b>   |
| <b>1230</b>              | <b>17</b>  | <b>1227</b>               | <b>17</b>  | <b>1214</b>               | <b>11</b>  | <b>1240</b>              | <b>2</b>   | <b>1239</b>               | <b>1</b>   | <b>1240</b>               | <b>1</b>   |
| <b>1287</b>              | <b>24</b>  | <b>1286</b>               | <b>22</b>  | <b>1280</b>               | <b>11</b>  | <b>1288</b>              | <b>24</b>  | <b>1285</b>               | <b>25</b>  | <b>1286</b>               | <b>25</b>  |
| <b>1312</b>              | <b>3</b>   | <b>1310</b>               | <b>5</b>   | <b>1302</b>               | <b>13</b>  | <b>1308</b>              | <b>15</b>  | <b>1310</b>               | <b>18</b>  | <b>1309</b>               | <b>16</b>  |
| <b>1332</b>              | <b>14</b>  | <b>1336</b>               | <b>4</b>   | <b>1337</b>               | <b>1</b>   | <b>1321</b>              | <b>1</b>   | <b>1322</b>               | <b>3</b>   | <b>1323</b>               | <b>3</b>   |
| <b>1339</b>              | <b>1</b>   | <b>1343</b>               | <b>10</b>  | <b>1353</b>               | <b>9</b>   | <b>1338</b>              | <b>2</b>   | <b>1336</b>               | <b>2</b>   | <b>1335</b>               | <b>1</b>   |
| <b>1355</b>              | <b>32</b>  | <b>1357</b>               | <b>22</b>  | <b>1364</b>               | <b>11</b>  | <b>1355</b>              | <b>20</b>  | <b>1353</b>               | <b>25</b>  | <b>1353</b>               | <b>19</b>  |
| <b>1386</b>              | <b>325</b> | <b>1389</b>               | <b>345</b> | <b>1385</b>               | <b>374</b> | <b>1378</b>              | <b>353</b> | <b>1374</b>               | <b>348</b> | <b>1377</b>               | <b>352</b> |
| <b>1429</b>              | <b>11</b>  | <b>1430</b>               | <b>11</b>  | <b>1429</b>               | <b>11</b>  | <b>1428</b>              | <b>4</b>   | <b>1426</b>               | <b>5</b>   | <b>1426</b>               | <b>5</b>   |
| <b>1442</b>              | <b>16</b>  | <b>1442</b>               | <b>11</b>  | <b>1440</b>               | <b>17</b>  | <b>1434</b>              | <b>17</b>  | <b>1433</b>               | <b>15</b>  | <b>1432</b>               | <b>15</b>  |
| <b>1444</b>              | <b>18</b>  | <b>1442</b>               | <b>22</b>  | <b>1443</b>               | <b>13</b>  | <b>1444</b>              | <b>11</b>  | <b>1443</b>               | <b>11</b>  | <b>1443</b>               | <b>11</b>  |



|             |            |             |            |             |            |             |            |
|-------------|------------|-------------|------------|-------------|------------|-------------|------------|
| <b>1122</b> | <b>30</b>  | <b>1123</b> | <b>65</b>  | <b>1116</b> | <b>35</b>  | <b>1129</b> | <b>66</b>  |
| <b>1160</b> | <b>279</b> | <b>1156</b> | <b>109</b> | <b>1161</b> | <b>267</b> | <b>1147</b> | <b>21</b>  |
| <b>1194</b> | <b>3</b>   | <b>1169</b> | <b>75</b>  | <b>1181</b> | <b>14</b>  | <b>1162</b> | <b>158</b> |
| <b>1240</b> | <b>13</b>  | <b>1238</b> | <b>24</b>  | <b>1246</b> | <b>13</b>  | <b>1244</b> | <b>20</b>  |
| <b>1260</b> | <b>8</b>   | <b>1275</b> | <b>12</b>  | <b>1257</b> | <b>4</b>   | <b>1273</b> | <b>17</b>  |
| <b>1302</b> | <b>15</b>  | <b>1305</b> | <b>1</b>   | <b>1298</b> | <b>20</b>  | <b>1305</b> | <b>4</b>   |
| <b>1328</b> | <b>41</b>  | <b>1321</b> | <b>14</b>  | <b>1331</b> | <b>38</b>  | <b>1322</b> | <b>13</b>  |
| <b>1336</b> | <b>2</b>   | <b>1336</b> | <b>1</b>   | <b>1337</b> | <b>6</b>   | <b>1338</b> | <b>4</b>   |
| <b>1359</b> | <b>3</b>   | <b>1352</b> | <b>11</b>  | <b>1360</b> | <b>3</b>   | <b>1356</b> | <b>9</b>   |
| <b>1391</b> | <b>40</b>  | <b>1390</b> | <b>48</b>  | <b>1390</b> | <b>42</b>  | <b>1392</b> | <b>41</b>  |
| <b>1425</b> | <b>8</b>   | <b>1431</b> | <b>5</b>   | <b>1429</b> | <b>10</b>  | <b>1431</b> | <b>11</b>  |
| <b>1432</b> | <b>8</b>   | <b>1434</b> | <b>17</b>  | <b>1438</b> | <b>15</b>  | <b>1439</b> | <b>15</b>  |
| <b>1438</b> | <b>10</b>  | <b>1439</b> | <b>11</b>  | <b>1446</b> | <b>12</b>  | <b>1444</b> | <b>17</b>  |
| <b>1446</b> | <b>21</b>  | <b>1445</b> | <b>22</b>  | <b>1451</b> | <b>13</b>  | <b>1454</b> | <b>12</b>  |
| <b>1471</b> | <b>173</b> | <b>1477</b> | <b>190</b> | <b>1477</b> | <b>162</b> | <b>1484</b> | <b>191</b> |
| <b>1600</b> | <b>15</b>  | <b>1580</b> | <b>5</b>   | <b>1599</b> | <b>28</b>  | <b>1579</b> | <b>4</b>   |
| <b>1620</b> | <b>6</b>   | <b>1628</b> | <b>8</b>   | <b>1620</b> | <b>4</b>   | <b>1628</b> | <b>8</b>   |
| <b>1770</b> | <b>285</b> | <b>1768</b> | <b>263</b> | <b>1771</b> | <b>290</b> | <b>1767</b> | <b>258</b> |
| 2729        | 1195       | 2713        | 1177       | 2745        | 1227       | 2704        | 1229       |
| 2964        | 3          | 2973        | 2          | 2962        | 1          | 2971        | 2          |
| 2977        | 8          | 2976        | 12         | 2975        | 15         | 2978        | 12         |
| 2984        | 4          | 2987        | 5          | 2978        | 4          | 2982        | 7          |
| 3008        | 1          | 3003        | 0          | 3013        | 0          | 3004        | 1          |
| 3021        | 1          | 3014        | 2          | 3023        | 1          | 3021        | 1          |
| 3034        | 1          | 3035        | 2          | 3034        | 2          | 3036        | 2          |
| 3063        | 4          | 3061        | 4          | 3067        | 3          | 3069        | 2          |
| 3070        | 1          | 3069        | 1          | 3072        | 1          | 3072        | 1          |
| 3264        | 133        | 3228        | 145        | 3266        | 140        | 3242        | 126        |
| 3392        | 90         | 3416        | 99         | 3393        | 84         | 3413        | 106        |
| 3630        | 181        | 3630        | 179        | 3631        | 183        | 3632        | 173        |

<sup>a</sup> Bold indicates the region of the IR spectrum included in the present experimental study.

**Table S15.** Vibrational frequencies ( $\text{cm}^{-1}$ ) scaled by 0.975 and IR intensities (kM/mole) for  $\text{H}^+$ (Met) [N,OH,S] conformers calculated at B3LYP/6-311+G(d,p) levels of theory<sup>a</sup>

| [N,OH,S]tgtgg | [N,OH,S]ttggg | [N,OH,S]tgtgt | [N,OH,S]ttggt |
|---------------|---------------|---------------|---------------|
| 22            | 1             | 48            | 2             |
| 44            | 7             | 53            | 3             |
| 80            | 4             | 82            | 1             |
| 146           | 10            | 134           | 3             |
| 152           | 3             | 157           | 0.4           |
| 193           | 2             | 234           | 37            |
| 214           | 9             | 257           | 7             |
| 280           | 8             | 289           | 4             |
| 313           | 23            | 304           | 13            |
| 341           | 17            | 341           | 10            |
| 361           | 3             | 362           | 2             |
| 423           | 27            | 472           | 34            |

Supplementary Material (ESI) for *PCCP*  
 This journal is © the Owner Societies 2010

|             |            |             |            |             |            |             |            |
|-------------|------------|-------------|------------|-------------|------------|-------------|------------|
| 496         | 14         | 505         | 24         | 495         | 12         | 508         | 30         |
| 560         | 33         | 520         | 15         | 561         | 37         | 521         | 14         |
| <b>612</b>  | <b>9</b>   | <b>609</b>  | <b>7</b>   | <b>627</b>  | <b>85</b>  | <b>624</b>  | <b>57</b>  |
| <b>631</b>  | <b>74</b>  | <b>624</b>  | <b>82</b>  | <b>635</b>  | <b>2</b>   | <b>632</b>  | <b>30</b>  |
| <b>677</b>  | <b>17</b>  | <b>678</b>  | <b>13</b>  | <b>683</b>  | <b>11</b>  | <b>682</b>  | <b>8</b>   |
| <b>702</b>  | <b>46</b>  | <b>697</b>  | <b>40</b>  | <b>701</b>  | <b>50</b>  | <b>696</b>  | <b>43</b>  |
| <b>784</b>  | <b>8</b>   | <b>791</b>  | <b>20</b>  | <b>793</b>  | <b>11</b>  | <b>794</b>  | <b>25</b>  |
| <b>825</b>  | <b>2</b>   | <b>819</b>  | <b>11</b>  | <b>837</b>  | <b>0.3</b> | <b>835</b>  | <b>5</b>   |
| <b>855</b>  | <b>27</b>  | <b>836</b>  | <b>5</b>   | <b>857</b>  | <b>26</b>  | <b>838</b>  | <b>4</b>   |
| <b>928</b>  | <b>4</b>   | <b>921</b>  | <b>5</b>   | <b>932</b>  | <b>7</b>   | <b>937</b>  | <b>1</b>   |
| <b>955</b>  | <b>4</b>   | <b>945</b>  | <b>9</b>   | <b>956</b>  | <b>8</b>   | <b>948</b>  | <b>15</b>  |
| <b>967</b>  | <b>15</b>  | <b>958</b>  | <b>3</b>   | <b>972</b>  | <b>2</b>   | <b>961</b>  | <b>8</b>   |
| <b>995</b>  | <b>8</b>   | <b>992</b>  | <b>14</b>  | <b>994</b>  | <b>18</b>  | <b>980</b>  | <b>10</b>  |
| <b>1021</b> | <b>28</b>  | <b>1049</b> | <b>20</b>  | <b>1026</b> | <b>30</b>  | <b>1053</b> | <b>8</b>   |
| <b>1070</b> | <b>105</b> | <b>1078</b> | <b>138</b> | <b>1066</b> | <b>49</b>  | <b>1076</b> | <b>143</b> |
| <b>1101</b> | <b>194</b> | <b>1105</b> | <b>121</b> | <b>1094</b> | <b>230</b> | <b>1107</b> | <b>131</b> |
| <b>1160</b> | <b>96</b>  | <b>1150</b> | <b>93</b>  | <b>1156</b> | <b>102</b> | <b>1147</b> | <b>44</b>  |
| <b>1196</b> | <b>6</b>   | <b>1171</b> | <b>13</b>  | <b>1185</b> | <b>15</b>  | <b>1153</b> | <b>41</b>  |
| <b>1235</b> | <b>29</b>  | <b>1239</b> | <b>33</b>  | <b>1242</b> | <b>29</b>  | <b>1246</b> | <b>32</b>  |
| <b>1272</b> | <b>4</b>   | <b>1279</b> | <b>14</b>  | <b>1270</b> | <b>2</b>   | <b>1276</b> | <b>9</b>   |
| <b>1300</b> | <b>21</b>  | <b>1295</b> | <b>22</b>  | <b>1298</b> | <b>19</b>  | <b>1291</b> | <b>32</b>  |
| <b>1309</b> | <b>46</b>  | <b>1320</b> | <b>12</b>  | <b>1309</b> | <b>54</b>  | <b>1323</b> | <b>8</b>   |
| <b>1335</b> | <b>1</b>   | <b>1339</b> | <b>1</b>   | <b>1336</b> | <b>4</b>   | <b>1338</b> | <b>5</b>   |
| <b>1357</b> | <b>0</b>   | <b>1348</b> | <b>1</b>   | <b>1360</b> | <b>1</b>   | <b>1352</b> | <b>1</b>   |
| <b>1361</b> | <b>14</b>  | <b>1371</b> | <b>5</b>   | <b>1362</b> | <b>14</b>  | <b>1372</b> | <b>5</b>   |
| <b>1425</b> | <b>11</b>  | <b>1430</b> | <b>6</b>   | <b>1428</b> | <b>10</b>  | <b>1430</b> | <b>11</b>  |
| <b>1431</b> | <b>11</b>  | <b>1432</b> | <b>22</b>  | <b>1438</b> | <b>15</b>  | <b>1436</b> | <b>23</b>  |
| <b>1440</b> | <b>8</b>   | <b>1438</b> | <b>13</b>  | <b>1443</b> | <b>12</b>  | <b>1439</b> | <b>16</b>  |
| <b>1443</b> | <b>19</b>  | <b>1442</b> | <b>20</b>  | <b>1449</b> | <b>10</b>  | <b>1457</b> | <b>8</b>   |
| <b>1485</b> | <b>121</b> | <b>1486</b> | <b>154</b> | <b>1488</b> | <b>115</b> | <b>1489</b> | <b>152</b> |
| <b>1604</b> | <b>23</b>  | <b>1591</b> | <b>28</b>  | <b>1600</b> | <b>33</b>  | <b>1592</b> | <b>24</b>  |
| <b>1614</b> | <b>24</b>  | <b>1625</b> | <b>15</b>  | <b>1614</b> | <b>34</b>  | <b>1622</b> | <b>33</b>  |
| <b>1818</b> | <b>296</b> | <b>1816</b> | <b>255</b> | <b>1817</b> | <b>295</b> | <b>1816</b> | <b>250</b> |
| 2687        | 1218       | 2671        | 1178       | 2734        | 1184       | 2708        | 1146       |
| 2959        | 5          | 2970        | 6          | 2958        | 3          | 2970        | 6          |
| 2975        | 9          | 2975        | 13         | 2977        | 14         | 2979        | 8          |
| 2986        | 4          | 2996        | 2          | 2979        | 3          | 2992        | 5          |
| 3002        | 1          | 2997        | 1          | 3005        | 1          | 2995        | 1          |
| 3014        | 1          | 3015        | 1          | 3019        | 1          | 3021        | 1          |
| 3037        | 1          | 3044        | 1          | 3036        | 2          | 3043        | 2          |
| 3060        | 4          | 3060        | 4          | 3068        | 2          | 3069        | 2          |
| 3070        | 0.4        | 3070        | 0.4        | 3073        | 1          | 3073        | 1          |
| 3353        | 87         | 3333        | 103        | 3350        | 90         | 3336        | 97         |
| 3407        | 80         | 3409        | 85         | 3405        | 81         | 3405        | 93         |
| 3633        | 176        | 3636        | 178        | 3633        | 178        | 3637        | 170        |

<sup>a</sup> Bold indicates the region of the IR spectrum included in the present experimental study.
